**INFERENCE OF CELL TYPE COMPOSITION FROM HUMAN BRAIN TRANSCRIPTOMIC DATASETS ILLUMINATES THE EFFECTS OF AGE, MANNER OF DEATH, DISSECTION, AND PSYCHIATRIC DIAGNOSIS**

\*Megan Hastings Hagenauer, Ph.D.<sup>1</sup>, Anton Schulmann, M.D.<sup>2</sup>, Jun Z. Li, Ph.D.<sup>3</sup>, Marquis P. Vawter, Ph.D.<sup>4</sup>, David M. Walsh, Psy.D.<sup>4</sup>, Robert C. Thompson, Ph.D.<sup>1</sup>, Cortney A. Turner, Ph.D.<sup>1</sup>, William E. Bunney, M.D.<sup>4</sup>, Richard M. Myers, Ph.D.<sup>5</sup>, Jack D. Barchas, M.D.<sup>6</sup>, Alan F. Schatzberg, M.D.<sup>7</sup>, Stanley J. Watson, M.D., Ph.D.<sup>1</sup>, Huda Akil, Ph.D.<sup>1</sup>

<sup>1</sup>Mol. Behavioral Neurosci. Inst., Univ. of Michigan, Ann Arbor, MI, USA; <sup>2</sup>Janelia Research Campus, Howard Hughes Medical Institute, Ashburn, VA, USA, <sup>3</sup>Genet., Univ. of Michigan, Ann Arbor, MI, USA; <sup>4</sup>Univ. of California, Irvine, CA; <sup>5</sup>HudsonAlpha Inst. for Biotech., Huntsville, AL, USA; <sup>6</sup>Stanford, Palo Alto, CA, <sup>7</sup>Cornell, New York, NY, USA

\*Corresponding Author: Megan Hastings Hagenauer, Ph.D.

e-mail: [hagenaue@umich.edu](mailto:hagenaue@umich.edu)

Molecular Behavioral Neuroscience Institute (MBNI)

205 Zina Pitcher Pl.

Ann Arbor, MI 48109

## Abstract

Psychiatric illness is unlikely to arise from pathology occurring uniformly across all cell types in affected brain regions. Despite this, transcriptomic analyses of the human brain have typically been conducted using macro-dissected tissue due to the difficulty of performing single-cell type analyses with donated post-mortem brains. To address this issue statistically, we compiled a database of several thousand transcripts that were specifically-enriched in one of 10 primary cortical cell types in previous publications. Using this database, we predicted the relative cell type composition for 833 human cortical samples using microarray or RNA-Seq data from the Pritzker Consortium (GSE92538) or publicly-available databases (GSE53987, GSE21935, GSE21138, CommonMind Consortium). These predictions were generated by averaging normalized expression levels across transcripts specific to each cell type using our R-package *BrainInABlender* (validated and publicly-released: <https://github.com/hagenaue/BrainInABlender>). Using this method, we found that the principal components of variation in the datasets strongly correlated with the neuron to glia ratio of the samples. This variability was not simply due to dissection – the relative balance of brain cell types appeared to be influenced by a variety of demographic, pre- and post-mortem variables. Prolonged hypoxia around the time of death predicted increased astrocytic and endothelial gene expression, illustrating vascular upregulation. Aging was associated with decreased neuronal gene expression. Red blood cell gene expression was reduced in individuals who died following systemic blood loss. Subjects with Major Depressive Disorder had decreased astrocytic gene expression, mirroring previous morphometric observations. Subjects with Schizophrenia had reduced red blood cell gene expression, resembling the hypofrontality detected in fMRI experiments. Finally, in datasets containing samples with especially variable cell content, we found that controlling for predicted sample cell content while evaluating differential expression improved the detection of previously-identified psychiatric effects. We conclude that accounting for cell type can greatly improve the interpretability of transcriptomic data.

## 1 **1. Introduction**

2           The human brain is a remarkable mosaic of diverse cell types stratified into rolling cortical layers,  
3 arching white matter highways, and interlocking deep nuclei. In the past decade, we have come to  
4 recognize the importance of this cellular diversity in even the most basic neural circuits. At the same time,  
5 we have developed the capability to comprehensively measure the thousands of molecules essential for  
6 cell function. These insights have provided conflicting priorities within the study of psychiatric illness: do  
7 we carefully examine individual molecules within their cellular and anatomical context or do we extract  
8 transcript or protein en masse to perform large-scale unbiased transcriptomic or proteomic analyses? In  
9 rodent models, researchers have escaped this dilemma by a boon of new technology: single cell laser  
10 capture, cell culture, and cell-sorting techniques can provide sufficient extract for transcriptomic and  
11 proteomic analyses. However, single cell type analyses of the human brain are far more challenging (1–3)  
12 – live tissue is only available in the rarest of circumstances and intact single cells are difficult to  
13 dissociate from post-mortem tissue without intensive procedures like laser capture microscopy.

14           Therefore, to date, the vast majority of unbiased transcriptomic analyses of the human brain have  
15 been conducted using macro-dissected, cell-type heterogeneous tissue. On Gene Expression Omnibus  
16 (GEO) alone, there are at least 63\* publicly-available macro-dissected post-mortem human brain tissue  
17 datasets, and many others are available to researchers via privately-funded portals (Stanley Medical  
18 Research Institute, Allen Brain Atlas, CommonMind Consortium). These datasets have provided us with  
19 novel hypotheses (e.g., (4,5)), but often a relatively small number of candidate molecules survive analysis  
20 despite careful sample collection, and interpreting molecular results in isolation from their respective  
21 cellular context can be exceedingly difficult. At the core of this issue is the inability to differentiate  
22 between (1) alterations in gene expression that reflect an overall disturbance in the relative ratio of the  
23 different cell types comprising the tissue sample, and (2) intrinsic dysregulation of one or more cell types,  
24 indicating perturbed biological function.

---

\* As of 9-14-2017

## Running Head: PREDICTING CELL TYPE BALANCE

25           In this manuscript, we present results from an easily accessible solution to this problem that  
26 allows researchers to statistically estimate the relative number or transcriptional activity of particular cell  
27 types in macro-dissected human brain transcriptomic data by tracking the collective rise and fall of  
28 previously identified cell type specific transcripts. Similar techniques have been used to successfully  
29 predict cell type content in human blood samples (6–9), as well as diseased and aged brain samples (10–  
30 12). Our method was specifically designed for application to large, highly-normalized human brain  
31 transcriptional profiling datasets, such as those commonly used by neuroscientific research bodies such as  
32 the Pritzker Neuropsychiatric Research Consortium and the Allen Brain Institute.

33           We took advantage of a series of newly available data sources depicting the transcriptome of  
34 known cell types, and applied them to infer the relative balance of cell types in our tissue samples. We  
35 draw from seven large studies detailing cell-type specific gene expression in a wide variety of cells in the  
36 forebrain and cortex (2,13–18). Our analyses include all major categories of cortical cell types (17),  
37 including two overarching categories of neurons that have been implicated in psychiatric illness (19):  
38 projection neurons, which are large, pyramidal, and predominantly excitatory, and interneurons, which  
39 are small and predominantly inhibitory (20). These are accompanied by three prevalent forms of glia that  
40 make up the majority of cells in the brain: oligodendrocytes, which provide the insulating myelin sheath  
41 for axons (21), astrocytes, which help create the blood-brain barrier and provide structural and metabolic  
42 support for neurons (21), and microglia, which serve as the brain’s resident macrophages and provide an  
43 active immune response (21). We also incorporate vascular cell types: endothelial cells, which line the  
44 interior surface of blood vessels, and mural cells (smooth muscle cells and pericytes), which regulate  
45 blood flow (22). We included progenitor cells because they are widely implicated in the pathogenesis of  
46 mood disorders (23). Within the cortex, these cells mostly take the form of immature oligodendrocytes  
47 (17). Finally, the primary cells found in blood, erythrocytes or red blood cells (RBCs), carry essential  
48 oxygen throughout the brain. These cells lack a cell nucleus and do not generate new RNA, but still  
49 contain an existing, highly-specialized transcriptome (24). The relative presence of these cells could

50 arguably represent overall blood flow, the functional marker of regional neural activity traditionally used  
51 in human imaging studies.

52 To characterize the balance of these cell types in psychiatric samples, we first demonstrate that our  
53 method of summarizing cell type specific gene expression into a single metric (“cell type index”) can  
54 reliably predict relative cell type balance in a variety of validation datasets. Then we discover that the  
55 predicted cell type balance of samples can explain a large percentage of the variation in macro-dissected  
56 human brain microarray and RNA-Seq datasets. This variability is driven by pre- and post-mortem  
57 subject variables, such as age, aerobic environment, and large scale blood loss, in addition to dissection.  
58 Finally, we demonstrate that our method enhances our ability to discover and interpret psychiatric effects  
59 in human transcriptomic datasets, uncovering previously-documented changes in cell type balance in  
60 relationship to Major Depressive Disorder and Schizophrenia and potentially increasing our sensitivity to  
61 detect genes with previously-identified relationships to Bipolar Disorder and Schizophrenia in datasets  
62 that contain samples with highly-variable cell content.

63

## 64 **2. Methods**

65

### 66 **2.1 Compiling a Database of Cell Type Specific Transcripts**

67 To perform this analysis, we compiled a database of several thousand transcripts that were  
68 specifically-enriched in one of nine primary brain cell types within seven published single-cell or purified  
69 cell type transcriptomic experiments using mammalian brain tissues (2,13–18). These primary brain cell  
70 types included six types of support cells: astrocytes, endothelial cells, mural cells, microglia, immature  
71 and mature oligodendrocytes, as well as two broad categories of neurons (interneurons and projection  
72 neurons). We also included a category for neurons that were extracted without purification by subtype  
73 (“neuron\_all”). The experimental and statistical methods for determining whether a transcript was  
74 enriched in a particular cell type varied by publication (**Table 1**), and included both RNA-Seq and

## Running Head: PREDICTING CELL TYPE BALANCE

75 microarray datasets. We focused on cell-type specific transcripts identified using cortical or forebrain  
76 samples because the data available for these brain regions was more plentiful than for the deep nuclei or  
77 the cerebellum. In addition, we artificially generated a list of 17 transcripts specific to erythrocytes by  
78 searching Gene Card for erythrocyte and hemoglobin-related genes (<http://www.genecards.org/>).

79 In all, we curated gene expression signatures for 10 cell types expected to account for most of the  
80 cells in the cortex. Our final database included 2499 unique human-derived or orthologous (as predicted  
81 by HCOP using 11 available databases: <http://www.genenames.org/cgi-bin/hcop>) transcripts, with a focus  
82 on coding varieties. We have made this database publicly available within **Suppl. Table 1**. An updateable  
83 version is also accessible within our R package (<https://github.com/hagenaue/BrainInABlender>) and as a  
84 downloadable spreadsheet ([https://sites.google.com/a/umich.edu/megan-hastings-hagenauer/home/cell-](https://sites.google.com/a/umich.edu/megan-hastings-hagenauer/home/cell-type-analysis)  
85 [type-analysis](https://sites.google.com/a/umich.edu/megan-hastings-hagenauer/home/cell-type-analysis)).

Running Head: PREDICTING CELL TYPE BALANCE

| Citation                                  | Subjects                       | Tissue                                                                                                 | Purification Method                                                                                                                    | Platform              | Stringency                                                              | Derived Cortical Cell Type Indices | Transcripts/Orthologs |
|-------------------------------------------|--------------------------------|--------------------------------------------------------------------------------------------------------|----------------------------------------------------------------------------------------------------------------------------------------|-----------------------|-------------------------------------------------------------------------|------------------------------------|-----------------------|
| Cahoy et al., <i>J Neuro</i> , 2008.      | Young transgenic mice          | Forebrain                                                                                              | Fluorescent cell sorting using antibodies to deplete non-specific cell types                                                           | Affymetrix microarray | >20 Fold Enrichment                                                     | Astrocyte_All                      | 73                    |
|                                           |                                |                                                                                                        |                                                                                                                                        |                       |                                                                         | Neuron_All                         | 80                    |
|                                           |                                |                                                                                                        |                                                                                                                                        |                       |                                                                         | Oligodendrocyte_All                | 50                    |
| Zhang et al., <i>J Neuro</i> , 2014       | Young transgenic mice          | Cortex                                                                                                 | Fluorescent cell sorting using antibodies to deplete non-specific cell types                                                           | RNA-Seq               | Top 40 transcripts with >20 Fold Enrichment                             | Astrocyte_All                      | 40                    |
|                                           |                                |                                                                                                        |                                                                                                                                        |                       |                                                                         | Endothelial_All                    | 40                    |
|                                           |                                |                                                                                                        |                                                                                                                                        |                       |                                                                         | Microglia_All                      | 40                    |
|                                           |                                |                                                                                                        |                                                                                                                                        |                       |                                                                         | Mural_Pericyte                     | 40                    |
|                                           |                                |                                                                                                        |                                                                                                                                        |                       |                                                                         | Neuron_All                         | 40                    |
|                                           |                                |                                                                                                        |                                                                                                                                        |                       |                                                                         | Oligodendrocyte_Myelinating        | 40                    |
|                                           |                                |                                                                                                        |                                                                                                                                        |                       |                                                                         | Oligodendrocyte_Newly-Formed       | 39                    |
| Oligodendrocyte_Progenitor Cell           | 40                             |                                                                                                        |                                                                                                                                        |                       |                                                                         |                                    |                       |
| Zeisel et al., <i>Science</i> , 2015      | Juvenile mice                  | Somatosensory cortex and CA1 hippocampus                                                               | Unbiased capture of single cells from whole tissue cell suspension                                                                     | RNA-Seq               | Enriched with 99.9% posterior probability                               | Astrocyte_All                      | 240                   |
|                                           |                                |                                                                                                        |                                                                                                                                        |                       |                                                                         | Endothelial_All                    | 353                   |
|                                           |                                |                                                                                                        |                                                                                                                                        |                       |                                                                         | Microglia_All                      | 436                   |
|                                           |                                |                                                                                                        |                                                                                                                                        |                       |                                                                         | Mural_All                          | 155                   |
|                                           |                                |                                                                                                        |                                                                                                                                        |                       |                                                                         | Neuron_Interneuron                 | 365                   |
|                                           |                                |                                                                                                        |                                                                                                                                        |                       |                                                                         | Neuron_Pyramidal_Cortical          | 294                   |
| Darmanis et al., <i>PNAS</i> , 2015       | Adult human epileptic patients | Anterior temporal lobe                                                                                 | Unbiased capture of single cells from whole tissue cell suspension                                                                     | RNA-Seq               | "Top 20" enriched transcripts                                           | Astrocyte_All                      | 21                    |
|                                           |                                |                                                                                                        |                                                                                                                                        |                       |                                                                         | Endothelial_All                    | 21                    |
|                                           |                                |                                                                                                        |                                                                                                                                        |                       |                                                                         | Microglia_All                      | 21                    |
|                                           |                                |                                                                                                        |                                                                                                                                        |                       |                                                                         | Neuron_All                         | 21                    |
|                                           |                                |                                                                                                        |                                                                                                                                        |                       |                                                                         | Oligodendrocyte_Mature             | 21                    |
| Doyle et al., <i>Cell</i> , 2008          | Young transgenic mice          | Cortex, striatum, cerebellum, spinal cord, basal forebrain, and brain stem                             | Capture of translated mRNA from specific cell types labeled in transgenic mice using translating ribosome affinity purification (TRAP) | Affymetrix microarray | Top 25 enriched transcripts determined by iterative rank comparisons    | Astrocyte_All                      | 25                    |
|                                           |                                |                                                                                                        |                                                                                                                                        |                       |                                                                         | Neuron_CorticoSpinal               | 25                    |
|                                           |                                |                                                                                                        |                                                                                                                                        |                       |                                                                         | Neuron_CorticoStriatal             | 25                    |
|                                           |                                |                                                                                                        |                                                                                                                                        |                       |                                                                         | Neuron_CorticoThalamic             | 25                    |
|                                           |                                |                                                                                                        |                                                                                                                                        |                       |                                                                         | Neuron_Interneuron_CORT            | 25                    |
|                                           |                                |                                                                                                        |                                                                                                                                        |                       |                                                                         | Neuron_Neuron_CCK                  | 25                    |
|                                           |                                |                                                                                                        |                                                                                                                                        |                       |                                                                         | Neuron_Neuron_PNOC                 | 24                    |
|                                           |                                |                                                                                                        |                                                                                                                                        |                       |                                                                         | Oligodendrocyte_All                | 25                    |
| Oligodendrocyte_Mature                    | 25                             |                                                                                                        |                                                                                                                                        |                       |                                                                         |                                    |                       |
| Daneman et al., <i>PLOS</i> , 2010        | Young transgenic mice          | Cortex                                                                                                 | Fluorescent cell sorting using antibodies to deplete non-specific cell types                                                           | Affymetrix microarray | >20 Fold enrichment for endothelial, >8 fold enrichment for vasculature | Endothelial_All                    | 49                    |
|                                           |                                |                                                                                                        |                                                                                                                                        |                       |                                                                         | Mural_Vascular                     | 50                    |
| Sugino et al., <i>Nature Neuro</i> , 2006 | Transgenic mice                | Cingulate and somatosensory cortices, basolateral amygdala, CA1-CA3 hippocampus, and dorsal LGN of the | Hand-sorting fluorescently-labeled cells followed by amplification                                                                     | Affymetrix microarray | Enriched with $p < 1.5E-11$                                             | Neuron_GABA                        | 32                    |
|                                           |                                |                                                                                                        |                                                                                                                                        |                       |                                                                         | Neuron_Glutamate                   | 67                    |
| <i>Gene card</i>                          | Human                          | Human                                                                                                  | Erythrocyte-related genes                                                                                                              | Unknown               | Unknown                                                                 | RBC_All                            | 17                    |

86

87 **Table 1. Thousands of transcripts have been identified as specifically-enriched in particular cortical**  
 88 **cell types within published single-cell or purified cell type transcriptomic experiments. The**  
 89 **experimental and statistical methods for determining whether a transcript was enriched in a cell type**  
 90 **varied by publication, and included both RNA-Seq and microarray datasets.**

91

92 **2.2 “BrainInABlender”: Employing the Database of Cell Type Specific Transcripts to Predict**  
93 **Relative Cell Type Balance in Heterogenous Brain Samples**

94 Next, we designed a method that uses the collective expression of cell type specific transcripts in  
95 brain tissue samples to predict the relative cell type balance of the samples (“BrainInABlender”). We  
96 specifically designed BrainInABlender to be compatible with large human brain transcriptional profiling  
97 datasets such as those used by our research consortium (Pritzker) and the Allen Brain Institute, which  
98 may lack full information about relative levels of expression within individual samples due to the  
99 extensive normalization procedures used to combine data across batches or platforms. We have made our  
100 method publicly-available in the form of a downloadable R package  
101 (<https://github.com/hagenaue/BrainInABlender>).

102 In brief, BrainInABlender extracts the data from transcriptional profiling datasets that represent  
103 genes identified in our database as having cell type specific expression in the brain (as curated by official  
104 gene symbol). Prior to application of our method, the dataset should be in the format of expression-level  
105 summary data (RNA-Seq: gene-level summary - CPM, RPKM or TPM; microarray: probe or probeset  
106 summary), and should have received at least some basic preprocessing, including log(2) transformation,  
107 normalization to eliminate technical variation, and standard quality control. Within BrainInABlender,  
108 these data are then centered and scaled across samples (mean=0, sd=1) to prevent transcripts with more  
109 variable signal from exerting disproportionate influence on the results. Then, if necessary, the normalized  
110 data from all transcripts representing the same gene are averaged for each sample and re-scaled. Finally,  
111 for each sample, these values are averaged across the genes identified as having expression specific to a  
112 particular cell type for each reference publication included in the database of cell type specific transcripts.  
113 This creates 38 cell type signatures derived from the cell type specific genes identified by the eight  
114 publications (“Cell Type Indices”), each of which predicts the relative content for one of the 10 primary  
115 cell types in our brain samples (**Figure 1**).

116 Later, during validation analyses (*Suppl. Section 7.2*), we found substantial support for simply  
117 averaging these 38 publication-specific cell type indices within each of the primary categories to produce



## Running Head: PREDICTING CELL TYPE BALANCE

118 ten consolidated primary cell-type indices for each sample. To perform this consolidation, we also  
 119 removed any transcripts that were identified as “cell type specific” to multiple primary cell type  
 120 categories (**Suppl. Figure 3**). These consolidated indices are included as output from BrainInABlender.

121 Please note that our method was specifically designed to tackle challenges present in our  
 122 microarray data, but we later discovered that it bears some resemblance to the existing method of  
 123 Population Specific Expression Analysis (PSEA, (10–12)). A more detailed discussion of the similarities  
 124 and differences between the techniques can be found in *Suppl. Section 7.2.2*.

125

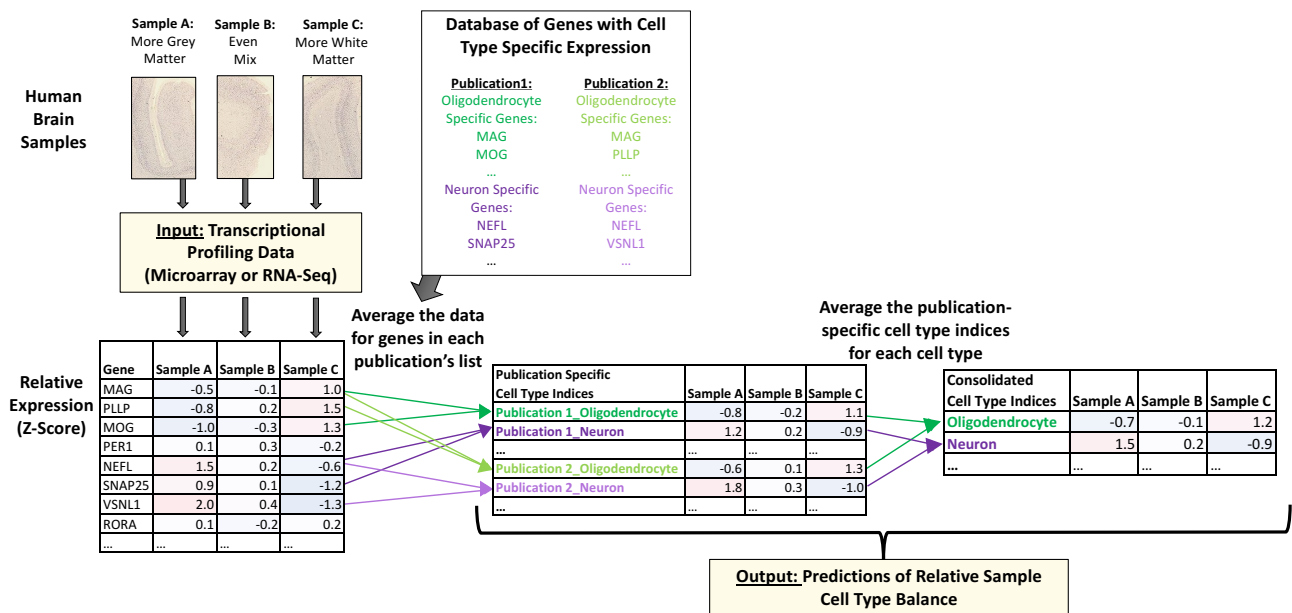

126 **Figure 1. Predicting the relative cell type balance in human brain samples using genes previously-**  
 127 **identified as having cell type specific expression.** Within macro-dissected brain tissue samples, variable  
 128 cell type balance is likely to influence the pattern of gene expression. To estimate this variability, we  
 129 extracted the data for genes that had been previously identified as having cell type specific expression in  
 130 previous publications (“Database of genes with cell type specific expression”, **Table 1**) and then  
 131 averaged across the transcripts identified as specific to a particular cell type for each reference  
 132 publication in our database to create 38 different “Cell Type Indices” that predicted relative cell content  
 133 in each of the brain samples. Then, for many analyses in our paper, these publication-specific cell type  
 134 indices were averaged within their cell type category to produce consolidated cell type indices  
 135 representing each of the 10 primary cell types in the human cortex.

136

### 137 **2.3 Validation of Relative Cell Content Predictions**

138 We initially validated our method using publicly-available datasets from purified cortical cell  
139 types (RNA-seq datasets GSE52564 and GSE6783), artificial mixtures of cells produced *in silico* by  
140 sampling from within these datasets, and microarray data from samples containing artificially-generated  
141 mixtures of cultured cells from P1 pups (Affymetrix Rat Genome 230 2.0 Array dataset GSE19380;  
142 further detail: **Suppl. Sections 7.1.1- 7.1.2**). For each of these analyses, we examined the correlation  
143 between the cell type indices outputted by BrainInABlender and the documented cell content of the  
144 samples.

145 Next, we wanted to see whether the cell content predictions produced by BrainInABlender could  
146 also correctly reflect relative cell type balance in human post-mortem samples. To test this, we applied  
147 our method to a large human post-mortem Agilent microarray dataset (841 samples) spanning 160 cortical  
148 and subcortical brain regions from the Allen Brain Atlas (<http://human.brain-map.org/microarray/search>,  
149 December 2015, (25)). This dataset was derived from high-quality tissue (absence of neuropathology,  
150 pH>6.7, post-mortem interval<31 hrs, RIN>5.5) from 6 human subjects (26). The tissue samples were  
151 collected using a mixture of block dissection and laser capture microscopy (27). After applying  
152 BrainInABlender, we compared the outputted cell type index results between selected brain regions  
153 known to contain relatively more (+) or less (-) of a particular cell type using Welch's t-test (further  
154 detail: **Suppl. Section 7.1.4**).

155

### 156 **2.4 Predicting Relative Cell Content in Transcriptomic Data from Macro-Dissected Human**

#### 157 **Cortical Tissue from Psychiatric Subjects**

158 Next, we profiled cell type specific gene expression in several large psychiatric human brain  
159 microarray datasets. The first was a large Pritzker Consortium Affymetrix U133A microarray dataset  
160 derived from high-quality human post-mortem dorsolateral prefrontal cortex samples (final n=157  
161 subjects), including tissue from subjects without a psychiatric or neurological diagnosis ("Controls",  
162 n=71), or diagnosed with Major Depressive Disorder ("MDD", n=40), Bipolar Disorder ("BP", n=24), or

## Running Head: PREDICTING CELL TYPE BALANCE

163 Schizophrenia (“Schiz”, n= 22). The severity and duration of physiological stress at the time of death was  
164 represented by an agonal factor score for each subject (ranging from 0-4, with 4 representing severe  
165 physiological stress (28,29)). We measured the pH of cerebellar tissue to indicate the extent of oxygen  
166 deprivation experienced around the time of death (28,29) and calculated the interval between the  
167 estimated time of death and the freezing of the brain tissue (the postmortem interval or PMI) using  
168 coroner records. Our current analyses began with subject-level summary gene expression data  
169 (GSE92538).

170 We determined the replicability of our results using three smaller publicly-available post-mortem  
171 human cortical Affymetrix U133Plus2 microarray datasets (GSE53987 (30), GSE21935 (31), GSE21138  
172 (32), **Table 2.** ). These datasets were selected because they included both psychiatric and control samples,  
173 and provided pH, PMI, age, and gender in the demographic information on the GEO website  
174 (<https://www.ncbi.nlm.nih.gov/geo/>). To control for technical variation, the sample processing batches  
175 were estimated using the microarray chip scan dates extracted from the .CEL files and RNA degradation  
176 was estimated using the R package AffyRNADegradation (33).

177 Finally, we also explored replicability within the recently-released large CommonMind  
178 Consortium (CMC) human dorsolateral prefrontal cortex RNA-seq dataset (34); downloaded from the  
179 CommonMind Consortium Knowledge Portal (<https://www.synapse.org/CMC>; final n=514 subjects). We  
180 predicted the relative cell type content of these samples using a newer version of BrainInABlender (v2)  
181 which excluded a few of the weaker cell type specific gene sets (15).

182 In general, the full preprocessing methods for these datasets can be found in *Suppl. Section 7.1*.  
183 The code for all analyses in the paper can be found at <https://github.com/hagenaue/> and  
184 [https://github.com/aschulmann/CMC\\_celltype\\_index](https://github.com/aschulmann/CMC_celltype_index).

Running Head: PREDICTING CELL TYPE BALANCE

**Microarray:**

| GEO Accession # | Published?                                | Brain Bank                        | Brain Region                | Sample Size (no outliers)                | Subjects per group (no outliers)       | AVE pH (+/- SD) | AVE Age (+/- SD) | AVE PMI (+/- SD) | % Female |
|-----------------|-------------------------------------------|-----------------------------------|-----------------------------|------------------------------------------|----------------------------------------|-----------------|------------------|------------------|----------|
| GSE92538        | <i>Current paper:</i><br>Hagenauer (2018) | Pritzker Consortium:<br>UC-Irvine | BA9/BA46                    | 337<br>(multiple replicates/<br>subject) | 157: 71 CNTRL, 24 BP, 40 MDD, 22 SCHIZ | 6.8<br>(+/-0.3) | 52<br>(+/-15)    | 24<br>(+/-9)     | 27%      |
| GSE53987        | Lanz et al. (2015)                        | PITT                              | BA46:<br><i>grey matter</i> | 66                                       | 66: 18 CNTRL, 17 BP, 17 MDD, 14 SCHIZ  | 6.6<br>(+/-0.3) | 46<br>(+/-10)    | 20<br>(+/-6)     | 45%      |
| GSE21935        | Barnes et al. (2011)                      | CCHPC                             | BA22                        | 42                                       | 42: 19 CNTRL, 23 SCHIZ                 | 6.3<br>(+/-0.3) | 70<br>(+/-19)    | 8<br>(+/-5)      | 45%      |
| GSE21138        | Narayan et al. (2008)                     | MHRI                              | BA46:<br><i>grey matter</i> | 54                                       | 54: 27 CNTRL, 27 SCHIZ                 | 6.3<br>(+/-0.2) | 45<br>(+/-17)    | 40<br>(+/-13)    | 17%      |

**RNA-Seq:**

| Public Data Release | Published?           | Brain Bank                                 | Brain Region                                    | Sample Size (all) | Subjects per group (all)              | AVE pH (+/- SD)  | AVE Age (+/- SD)               | AVE PMI (+/- SD) | % Female |
|---------------------|----------------------|--------------------------------------------|-------------------------------------------------|-------------------|---------------------------------------|------------------|--------------------------------|------------------|----------|
| Synapse.org         | Fromer et al. (2016) | CommonMind Consortium:<br>MSSM, PENN, PITT | BA9 /<br>BA46<br>(PITT:<br><i>grey matter</i> ) | 621               | 603: 285 CNTRL, 263 SCZ, 47 BP, 8 AFF | 6.5<br>(+/- 0.3) | 65<br>(+/- 18)<br>(binned 90+) | 17<br>+/- 11     | 41%      |

185

186 **Table 2.** We examined the pattern of cell-type specific gene expression in five post-mortem human  
 187 cortical tissue datasets that included samples from subjects with psychiatric illness. Abbreviations:  
 188 CTRL: control, BP: Bipolar Disorder, MDD: Major Depressive Disorder, SCHIZ: Schizophrenia, GEO:  
 189 Gene Expression Omnibus, BA: Brodmann’s Area, PMI: Post-mortem interval, SD: Standard Deviation,  
 190 Brain Banks: UC-Irvine (University of California – Irvine), PITT (University of Pittsburgh), CCHPC  
 191 (Charing Cross Hospital Prospective Collection), MSSM (Mount Sinai Icahn School of Medicine), MHRI  
 192 (Mental Health Research Institute Australia), PENN (University of Pennsylvania)

193

194 **3.5 Examining the Relationship Between Predicted Cell Content Derived from Transcriptional**

195 **Profiling Data and Clinical/Biological Variables**

196 We next set out to observe the relationship between the predicted cell content of our samples and  
 197 a variety of medically-relevant subject variables. To perform this analysis, we first examined the  
 198 relationship between seven relevant subject variables and each of the ten consolidated cell type indices in  
 199 the Pritzker prefrontal cortex dataset using a linear regression model that allowed us to simultaneously  
 200 control for other likely confounding variables:

201 **Equation 1:**

202 Cell Type Index=  $\beta_0 + \beta_1*(\text{Brain pH}) + \beta_2*(\text{Agonal Factor})$   
 203  $+ \beta_3*(\text{PMI}) + \beta_4*(\text{Age}) + \beta_5*(\text{Sex}) + \beta_6*(\text{Diagnosis}) + \beta_7*(\text{Exsanguination}) + \epsilon$

204 We then examined the replicability of these relationships using data from the three smaller  
205 publicly-available human post-mortem microarray datasets (GSE53987, GSE21935, GSE21138). For  
206 these datasets, we initially lacked detailed information about manner of death (agonal factor and  
207 exsanguination), but were able to control for technical variation within the model using statistical  
208 estimates of RNA degradation and batch (scan date):

209 **Equation 2:**

$$210 \text{ Cell Type Index} = \beta_0 + \beta_1 * (\text{Brain pH}) + \beta_2 * (\text{PMI}) + \beta_3 * (\text{Age}) + \beta_4 * (\text{Sex}) + \beta_5 * (\text{Diagnosis}) + \\ 211 \beta_6 * (\text{RNA Degradation}) + \beta_7 * (\text{Batch, when applicable}) + \varepsilon$$

212 We evaluated replicability by performing a meta-analysis for each variable and cell type combination  
213 across the four microarray datasets. To do this, we applied random effects modeling to the respective  
214 betas and accompanying sampling variance derived from each dataset using the *rma.mv()* function within  
215 the *metafor* package (35). P-values were corrected for multiple comparisons following the Benjamini-  
216 Hochberg method (FDR or q-value; (36)).

217 Finally, we characterized these relationships in the large CMC RNA-seq dataset. For this dataset, we  
218 had some information about manner of death but lacked knowledge of agonal factor or exsanguination.  
219 We controlled for technical variation due to dissection site (institution) and RNA degradation (RIN):

220 **Equation 3:**

$$221 \text{ Cell Type Index} = \beta_0 + \beta_1 * (\text{Brain pH}) + \beta_2 * (\text{PMI}) + \beta_3 * (\text{Age}) + \beta_4 * (\text{Sex}) + \beta_5 * (\text{Diagnosis}) + \\ 222 \beta_6 * (\text{RNA Degradation}) + \beta_7 * (\text{Institution}) + \beta_8 * (\text{MannerOfDeath}) + \varepsilon \\ 223$$

### 224 **3.6 Characterizing Psychiatric Gene Expression using Differential Expression Models that Include** 225 **Either Standard Co-variates or Cell Type Indices**

226 To determine whether controlling for variability in cell type balance in the dataset could improve our  
227 ability to detect differential expression related to psychiatric illness, we compared differential expression  
228 results within the human psychiatric datasets that were derived from linear regression models of  
229 increasing complexity, including a simple base model containing just the variable of interest (“Model 1”),  
230 a standard model controlling for traditional co-variates (“Model 2”), and a model controlling for

231 traditional co-variates as well as each of the cell type indices (“Model 5”). We also used two reduced  
232 models that only included the most prevalent cell types (Astrocyte, Microglia, Oligodendrocyte,  
233 Neuron\_Interneuron, Neuron\_Projection; (21)) to avoid issues with multicollinearity. The first of these  
234 models included traditional co-variates (“Model 4”), whereas the second model excluded them (“Model  
235 3”) (**Equation 4**).

236 **Equation 4: A model of gene expression for each dataset, colored to illustrate the subcomponents**  
237 **evaluated during our model comparison (#M1-M5).** The base model (intercept and variable of interest)  
238 is presented in green, traditional subject variable covariates are blue, the cell type indices for the most  
239 prevalent cell types are red, and the remaining cell type indices are purple. Model components unique to  
240 each dataset are underlined.

241 **The Pritzker microarray dataset:**

242 Gene Expression (Probeset Signal) =  
243  $\beta_0 + \beta_1 * (\text{The variable of interest: Diagnosis})$   
244  $+ \beta_2 * (\text{Brain pH}) + \beta_3 * (\text{PMI}) + \beta_4 * (\text{Age}) + \beta_5 * (\text{Sex}) + \beta_6 * (\text{Agonal Factor}) +$   
245  $+ \beta_7 * (\text{Astrocyte}) + \beta_8 * (\text{Oligodendrocyte}) + \beta_9 * (\text{Microglia}) + \beta_{10} * (\text{Interneuron}) + \beta_{11} * (\text{ProjectionNeuron})$   
246  $+ \beta_{12} * (\text{Endothelial}) + \beta_{13} * (\text{Neuron\_All}) + \beta_{14} * (\text{Oligodendrocyte\_Immature}) + \beta_{15} * (\text{Mural}) + \beta_{16} * (\text{RBC}) + \epsilon$

247 **The CMC RNA-Seq dataset:**

248 Gene Expression (Probeset Signal) =  
249  $\beta_0 + \beta_1 * (\text{The variable of interest: Diagnosis})$   
250  $+ \beta_2 * (\text{Brain pH}) + \beta_3 * (\text{PMI}) + \beta_4 * (\text{Age}) + \beta_5 * (\text{Sex}) + \beta_6 * (\text{RIN}) + \beta_7 * (\text{Institution}) + \beta_8 * (\text{CauseOfDeath}) +$   
251  $+ \beta_9 * (\text{Astrocyte}) + \beta_{10} * (\text{Oligodendrocyte}) + \beta_{11} * (\text{Microglia}) + \beta_{12} * (\text{Interneuron}) + \beta_{13} * (\text{ProjectionNeuron})$   
252  $+ \beta_{14} * (\text{Endothelial}) + \beta_{15} * (\text{Neuron\_All}) + \beta_{16} * (\text{Oligodendrocyte\_Immature}) + \beta_{17} * (\text{Mural}) + \beta_{18} * (\text{RBC}) + \epsilon$   
253

254 **The smaller microarray datasets (GSE53987, GSE21935, GSE21138):**

255 Gene Expression (Probeset Signal) =  
256  $\beta_0 + \beta_1 * (\text{The variable of interest: Diagnosis})$   
257  $+ \beta_2 * (\text{Brain pH}) + \beta_3 * (\text{PMI}) + \beta_4 * (\text{Age}) + \beta_5 * (\text{Sex}) + \beta_6 * (\text{RNADegradation}) +$   
258  $+ \beta_7 * (\text{Astrocyte}) + \beta_8 * (\text{Oligodendrocyte}) + \beta_9 * (\text{Microglia}) + \beta_{10} * (\text{Interneuron}) + \beta_{11} * (\text{ProjectionNeuron})$   
259  $+ \beta_{12} * (\text{Endothelial}) + \beta_{13} * (\text{Neuron\_All}) + \beta_{14} * (\text{Oligodendrocyte\_Immature}) + \beta_{15} * (\text{Mural}) + \beta_{16} * (\text{RBC}) + \epsilon$

260

### 261 3.7 Functional Ontology with Cell Type Specific Gene Sets

262 We ran a series of analyses to evaluate how well we could distinguish between changes in cell type  
263 balance in the tissue and changes in cell type specific functions. First, as a case study, we specifically  
264 examined the relationship between age and the functional annotation for genes found in the Neuron\_All  
265 index in more depth. To do this, we evaluated the relationship between age and gene expression in the  
266 Pritzker dataset using a standard model that controlled for traditional confounds (“Model 2”) using the

267 signal data for all probesets in the dataset. We used “DAVID: Functional Annotation Tool”  
268 ([//david.ncifcrf.gov/summary.jsp](http://david.ncifcrf.gov/summary.jsp), (37,38) to identify the functional clusters that were overrepresented by  
269 the genes included in our neuronal cell type index (using the full HT-U133A chip as background), and  
270 then determined the average effect of age (beta) for the genes included in each of the 240 functional  
271 clusters. These functional clusters overrepresented dendritic/axonal related functions, so for a follow-up  
272 analysis, in a manner that was blind to the results, we subsetted the results into 29 functional clusters that  
273 were clearly related to dendritic/axonal functions and 41 functional clusters that seemed distinctly  
274 unrelated to dendritic/axonal functions (**Suppl. Table 4**) and compared the average effect of age in these  
275 two subsets using a Welch’s t-test.

276 In the next analysis, we decided to make the process of differentiating between altered cell type-  
277 specific functions and relative cell type balance more efficient. We used our cell type specific gene lists to  
278 construct gene sets in a file format (.gmt) compatible with the popular tool Gene Set Enrichment Analysis  
279 (GSEA, (39,40)) and combined them with two other commonly-used gene set collections from the  
280 molecular signatures database (MSigDB: <http://software.broadinstitute.org/gsea/msigdb/index.jsp>,  
281 downloaded 09/2017, “C2: Curated Gene Sets” and “C5: GO Gene Sets”, **Suppl. Table 5**). Then we  
282 tested the utility of incorporating our new gene sets into GSEA (fgSEA: (41)) using the ranked results  
283 (betas) for the relationship between each subject variable and each probeset in the Pritzker dataset (as  
284 evaluated using a standard model: “Model 2”).

285

### 286 3. Results & Discussion

287

#### 288 3.1 Validation of Relative Cell Content Predictions

289 *Validation Using Datasets Derived from Purified or Cultured Cells:* We initially validated our  
290 method using publicly-available datasets from purified cell types (datasets GSE52564 and GSE6783;  
291 (2,18) and *in silico* derived mixtures and found that the statistical cell type indices easily predicted the cell



## Running Head: PREDICTING CELL TYPE BALANCE

292 type identities of the samples (*Suppl. Section 7.2.10*). Therefore, as further validation, we determined  
293 whether relative cell type balance could be accurately deciphered from microarray data for samples  
294 containing artificially-generated mixtures of cultured cells (GSE19380; (12)). We found that the  
295 consolidated cell type indices produced by BrainInABlender strongly correlated with the actual  
296 percentage of cells of a particular type included in the artificial mixtures (**Figure 2**, Neuron% vs.  
297 Neuron\_All Index:  $R^2=0.93$ ,  $p=1.54e-15$ , Astrocyte% vs. Astrocyte Index:  $R^2=0.77$ ,  $p=5.05e-09$ ,  
298 Microglia% vs. Microglia Index:  $R^2=0.64$ ,  $p=8.2e-07$ ), although we found that the cell type index for  
299 immature oligodendrocytes better predicted the percentage of cultured oligodendrocytes in the samples  
300 than the cell type index for mature oligodendrocytes (Mature:  $R^2=0.45$ ,  $p=0.000179$ , Immature:  $R^2=0.81$ ,  
301  $p=4.14e-10$ ). We believe this discrepancy is likely to reflect the specific cell culture conditions used in the  
302 original admixture experiment. Notably, the relationship between the consolidated cell type indices and  
303 the actual percentage of each cell type included in the artificial mixtures was approximately linear, despite  
304 the use of  $\log(2)$ -transformed expression data.



Running Head: PREDICTING CELL TYPE BALANCE

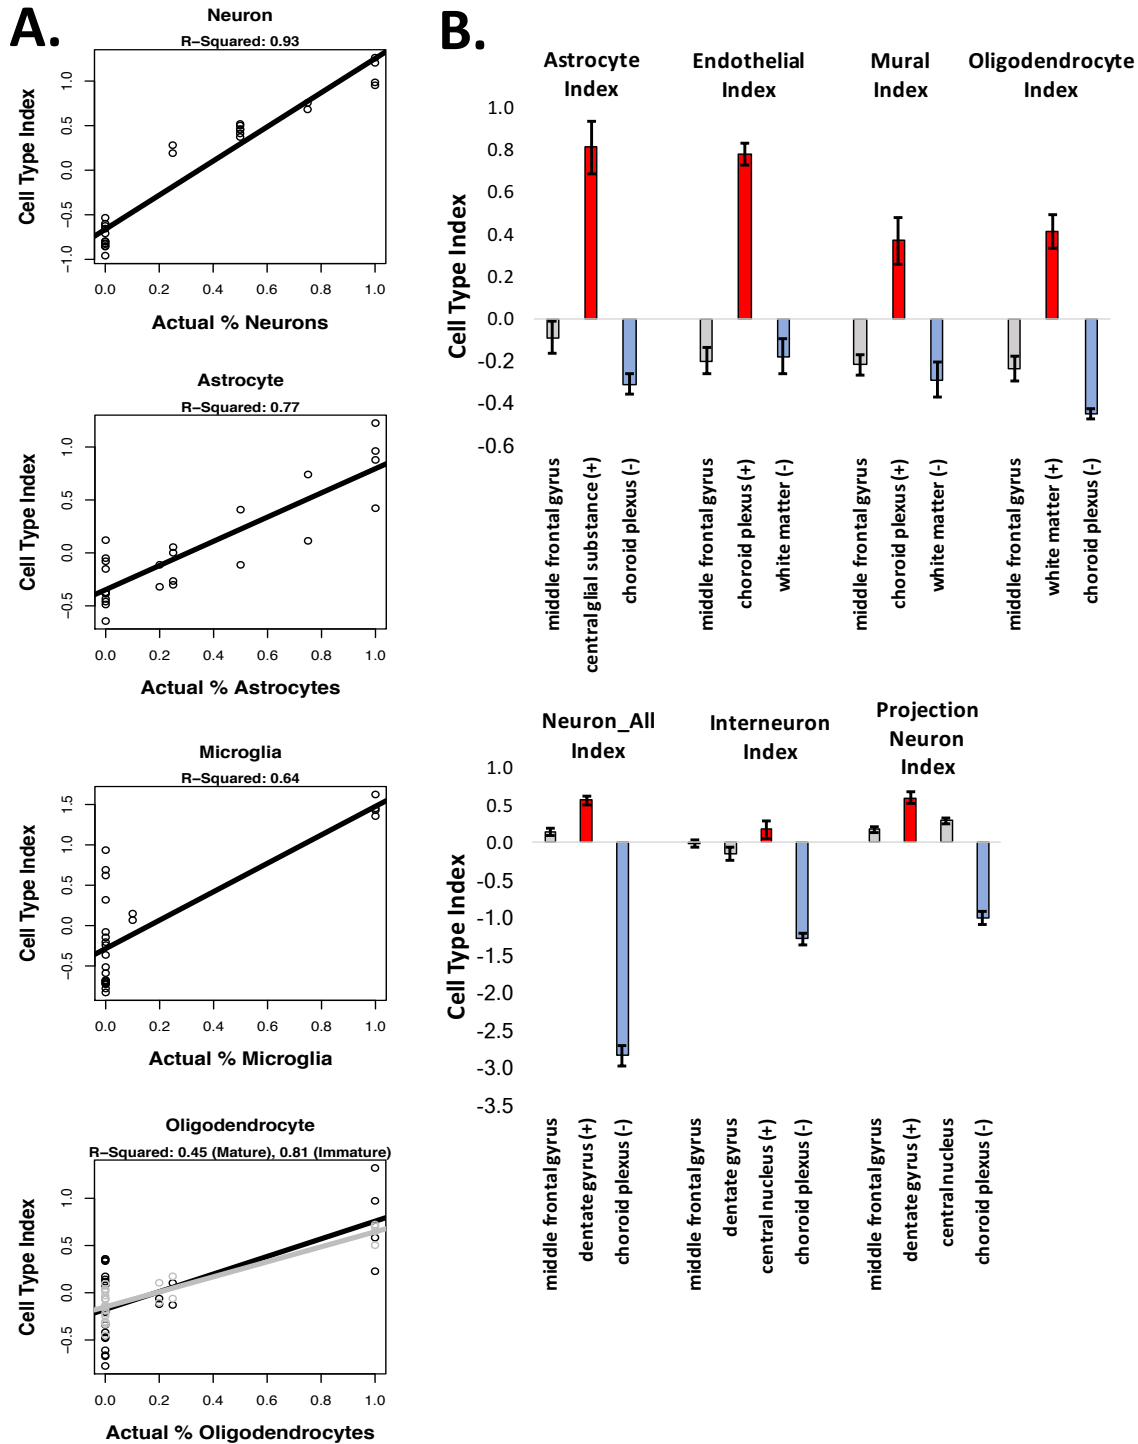

305 **Figure 2. Validation of Relative Cell Content Predictions.** A) Using a microarray dataset derived from  
 306 samples that contained artificially-generated mixtures of cultured cells (GSE19380; (12)), we found that  
 307 our relative cell content predictions (“cell type indices”) closely reflected actual known content.  
 308 However, note that the numeric values for the cell type indices do not convey an absolute proportion of  
 309 cells of a particular type in the sample - simply whether a sample contains relatively more or less of the  
 310 cell type of interest in comparison to other samples in the dataset. B) Our cell type indices also easily

## Running Head: PREDICTING CELL TYPE BALANCE

311 *differentiated human post-mortem samples derived from brain regions that are known to contain*  
312 *relatively more (+, red) or less (-, blue) of the targeted cell type of interest (all  $p < 0.007$ ). Results from the*  
313 *middle frontal gyrus are included for comparison, since the rest of the paper primarily focuses on*  
314 *prefrontal cortical data. (Bars: average  $\pm$  SE).*

315

316 ***Validation Using a Dataset Derived from Human Post-Mortem Tissue:*** Next, we wanted to see  
317 whether the cell content predictions produced by BrainInABlender correctly reflected relative cell type  
318 balance in human post-mortem samples. To test this, we applied our method to a large cross-regional  
319 human post-mortem microarray dataset (25), and extracted the results for a selection of brain regions that  
320 are known to contain relatively more (+) or less (-) of particular cell types (the results for other regions  
321 can be found in **Suppl. Table 2**). The results clearly indicated that our cell type analyses could identify  
322 well-established differences in cell type balance across brain regions (**Figure 2**, (+) region vs. (-) region  
323 for all cell types:  $p < 0.007$ , Cohen's  $d > 3.2$ ). The choroid plexus had elevated gene expression specific to  
324 vasculature (endothelial cells, mural cells, (42)). The corpus callosum and cingulum bundle showed an  
325 enrichment of oligodendrocyte-specific gene expression (42). The central glial substance was enriched  
326 with gene expression specific to glia and support cells, especially astrocytes. The dentate gyrus, which  
327 contains densely-packed glutamatergic granule cells (43), was enriched for gene expression specific to  
328 projection neurons. The highly GABA-ergic central nucleus of the amygdala (44) had a slight enrichment  
329 of gene expression specific to interneurons. These results provide fundamental validation that our  
330 methodology can accurately predict relative cell type balance in human post-mortem samples. Moreover,  
331 these results suggest that the cell type indices are capable of generally tracking their respective cell types  
332 in subcortical structures, despite the dependency of our method on cell type specific gene lists derived  
333 from the forebrain and cortex.

334

335 **3.8 Inferred Cell Type Composition Explains a Large Percentage of the Sample-Sample Variability**  
336 **in Transcriptomic Data from Macro-Dissected Human Cortical Tissue**

337 Using principal components analysis we found that the primary gradients of gene expression  
338 variation across samples in all four of the cortical transcriptomic datasets strongly correlated with our  
339 estimates of cell type balance. For example, while analyzing the Pritzker microarray dataset, we found  
340 that the first principal component (PC1), which encompassed 23% of the variation in gene expression  
341 across samples in the dataset, spanned from samples with high predicted support cell content to samples  
342 with high predicted neuronal content. Therefore, a large percentage of the variation in PC1 (91%) was  
343 accounted for by an average of the astrocyte and endothelial indices ( $p=2.2e-82$ , with a respective  $R^2$  of  
344 0.80 and 0.75 for each index analyzed separately) or by the general neuron index ( $p=6.3e-32$ ,  $R^2=0.59$ ).  
345 The second notable gradient in the dataset (PC2) encompassed 12% of the variation overall, and spanned  
346 samples with high predicted projection neuron content to samples with high predicted oligodendrocyte  
347 content (with a respective  $R^2$  of 0.62 and 0.42, and  $p$ -values of  $p=8.5e-35$  and  $p=8.7e-20$ ).

348 To confirm that the strong relationship between the top principal components of variation and our  
349 cell type indices did not originate artificially due to cell type specific genes representing a large  
350 percentage of the most highly variable transcripts in the dataset, we repeated the principal components  
351 analysis after excluding all cell type specific transcripts from the dataset and still found these strong  
352 correlations (**Figure 3**; PC1 vs. average astrocyte/endothelial index:  $R^2=0.89$ ,  $p=1.1e-76$ ; PC2 vs.  
353 projection neuron index:  $R^2=0.65$ ,  $p=1.6e-37$ ). Indeed, individual cell type indices still better accounted  
354 for the main principal components of variation in the microarray data than *all other major subject*  
355 *variables combined* (pH, Agonal Factor, PMI, Age, Gender, Diagnosis; PC1:  $R^2=0.416$ , PC2:  $R^2=0.203$ ).  
356 Similarly, when examining the data for individual probesets, a linear model that included just the six  
357 subject variables (**Equation 4**) accounted for an average of only 12% of the variation ( $R^2$ ,  
358  $Adj.R^2=0.0692$ ), whereas a linear model including the astrocyte and projection neuron indices alone  
359 accounted for 17% ( $R^2$ ,  $Adj.R^2=0.156$ ) and a linear model including all 10 cell types accounted for an  
360 average of 30% ( $R^2$ ,  $Adj.R^2=0.255$ ), almost one third of the variation present in the data for any particular

## Running Head: PREDICTING CELL TYPE BALANCE

361 probeset. Therefore, a large percentage of the genes in our dataset seemed to be preferentially expressed  
362 in relationship to particular cell types, even if their expression was not defined as strictly cell type specific  
363 in our database.

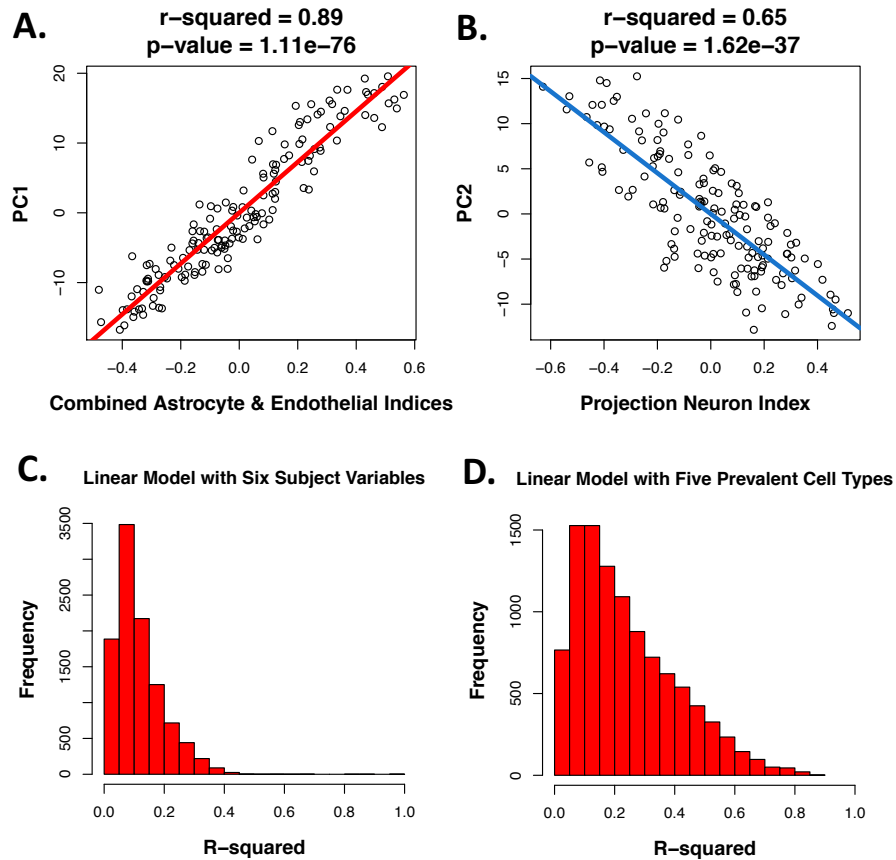

364

365 **Figure 3. Cell content predictions explain a large percentage of the variability in microarray data**  
366 **derived from the human cortex.** As an example, within the Pritzker dataset, even after excluding all data  
367 from genes identified as cell type specific in our database, **A)** the first principal component of variation  
368 (PC1) was strongly correlated with predicted “support cell” content in the samples (the average of the  
369 astrocyte and endothelial indices). **B)** PC2 was strongly correlated with predicted projection neuron  
370 content. Likewise, when applying a linear model to the data for each probeset, the  $R^2$  values for each  
371 probeset (illustrated in the histogram) tended to be much smaller when using a model that included **C)**  
372 only the six subject variables, versus **D)** only the five most prevalent cortical cell types.

373

374 Within the other four human cortical tissue datasets, the relationships between the top principal  
375 components of variation and the consolidated cell type indices were similarly strong (**Suppl. Section 3.8**),  
376 despite the fact that these datasets had received less preprocessing to remove the effects of technical  
377 variation. These results indicated that accounting for cell type balance is important for the interpretation

378 of post-mortem human brain transcriptomic data and might improve the signal-to-noise ratio in analyses  
379 aimed at identifying psychiatric risk genes.

### 380 **3.9 Cell Content Predictions Derived from Transcriptional Profiling Data Match Known**

#### 381 **Relationships Between Clinical/Biological Variables and Brain Tissue Cell Content**

382 We next set out to observe the relationship between the predicted cell content of our samples and a  
383 variety of medically-relevant subject variables. This analysis uncovered many relationships that had been  
384 previously-identified using other paradigms or animal models (**Figure 4, Suppl. Table 3**).

385 **Dissection:** First, as a proof of principle, we were able to clearly observe dissection differences  
386 between institutions within the large CMC RNA-Seq dataset, with samples from University of Pittsburgh  
387 having a predicted relative cell type balance that closely matched what would be expected due to their  
388 gray matter only dissection method (Oligodendrocyte:  $\beta = -0.404$ ,  $p = 2.42e-11$ ; Microglia:  $\beta = -0.274$ ,  
389  $p = 3.06e-05$ ; Neuron\_Interneuron:  $\beta = 0.0916$ ,  $p = 0.0161$ ; Neuron\_Projection:  $\beta = 0.145$ ,  $p = 2.31e-05$ ; Mural:  
390  $\beta = 0.170$ ,  $p = 2.14e-08$ ; Endothelial:  $\beta = 0.200$ ,  $p = 1.12e-05$ ). In contrast, samples from University of  
391 Pennsylvania were associated with lower predicted cell content related to vasculature (Endothelial:  $\beta = -$   
392  $0.255$ ,  $p = 4.01e-04$ ; Mural:  $\beta = -0.168$ ,  $p = 4.59e-04$ ; Astrocyte:  $\beta = -0.189$ ,  $p = 7.47e-03$ ).

393 **Manner of Death:** Predicted cell type content was also closely related to manner of death. Within the  
394 Pritzker dataset we found that subjects who died in a manner that involved exsanguination had a notably  
395 low red blood cell index ( $\beta = -0.398$ ;  $p = 0.00056$ ). Later, we were able replicate this result within  
396 GSE21138 using data from 5 subjects who were also likely to have died in a manner involving  
397 exsanguination ( $\beta = -0.516$ ,  $p = 0.052$  *trend*, manner of death reported in suppl. in (32)).

398 The presence of prolonged hypoxia around the time of death, as indicated by either low brain pH or  
399 high agonal factor score within the Pritzker dataset, was associated with a large increase in the endothelial  
400 cell index (Agonal Factor:  $\beta = 0.118$   $p = 2.85e-07$ ; Brain pH:  $\beta = -0.210$ ,  $p = 0.0003$ ) and astrocyte index  
401 (Brain pH:  $\beta = -0.437$ ,  $p = 2.26e-07$ ; Agonal Factor:  $\beta = 0.071$ ,  $p = 0.024$ ), matching previous demonstrations  
402 of cerebral angiogenesis, endothelial and astrocyte activation and proliferation in low oxygen

## Running Head: PREDICTING CELL TYPE BALANCE

403 environments (45). Smaller increases were also seen in the mural index (Mural vs. Agonal Factor:  $\beta=$   
404 0.0493,  $p=0.0286$ ). In contrast, prolonged hypoxia was associated with a clear decrease in all of the  
405 neuronal indices (Neuron\_All vs. Agonal Factor:  $\beta=-0.242$ ,  $p=3.58e-09$ ; Neuron\_All vs. Brain pH:  
406  $\beta=0.334$ ,  $p=0.000982$ ; Neuron\_Interneuron vs. Agonal Factor:  $\beta=-0.078$ ,  $p=4.13e-05$ ;  
407 Neuron\_Interneuron vs. Brain pH:  $\beta=0.102$ ,  $p=0.034$ ; Neuron\_Projection vs. Agonal Factor:  $\beta=-0.096$ ,  $p=$   
408 0.000188), mirroring the notorious vulnerability of neurons to low oxygen (e.g., (46)).

409 These overall effects of hypoxia on predicted cell type balance replicated in the smaller human  
410 microarray post-mortem datasets (Astrocyte vs. Brain pH (meta-analysis:  $b=-0.459$ ,  $p=2.59e-11$ ):  
411 GSE21138:  $\beta=-0.856$ ,  $p=0.00661$ , GSE53987:  $\beta=-0.461$ ,  $p=0.00812$ , Neuron\_All vs. Brain pH (meta-  
412 analysis:  $b=0.245$ ,  $p=7.72e-04$ ), Neuron\_Interneuron vs. Brain pH (meta-analysis:  $b=0.109$ ,  $p=7.89e-03$ ):  
413 GSE21138:  $\beta=0.381134$ ,  $p=0.0277$ ), despite lack of information about agonal factor, and partially  
414 replicated in the CMC human RNA-Seq dataset (Neuron\_Interneuron vs. Brain pH:  $\beta=0.186$ ,  $p=9.81e-$   
415 05). In several datasets, we also found that prolonged hypoxia correlated with a decreased microglial  
416 index (Microglia vs. Brain pH: GSE53987:  $\beta=0.462$ ,  $p=0.00603$ ; CMC:  $\beta=0.286$ ,  $p=4.66e-04$ ).

417

Running Head: PREDICTING CELL TYPE BALANCE

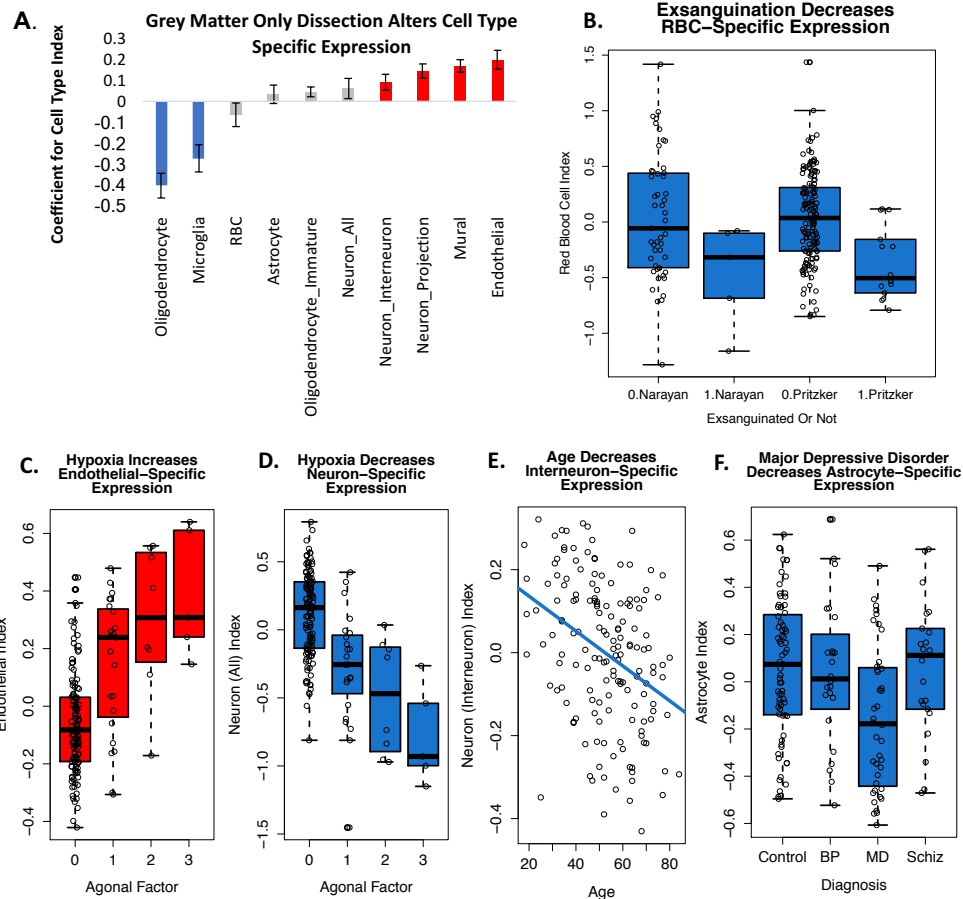

**G. The most highly replicated effects across datasets:**

|                                       | Pritzker | Lanz et al. 2015 | Barnes et al. 2011 | Narayan et al. 2008 | Meta-Analysis: Nominal P-value | Meta-Analysis: FDR (q-value) | CMC   | CMC: Nominal P-value | CMC: FDR (q-value) | Replication in Microarray Meta-analysis and CMCC |
|---------------------------------------|----------|------------------|--------------------|---------------------|--------------------------------|------------------------------|-------|----------------------|--------------------|--------------------------------------------------|
| <b>Hypoxia:</b>                       |          |                  |                    |                     |                                |                              |       |                      |                    |                                                  |
| Astrocyte vs. Brain pH                | -5.4     | -2.7             | -1.1               | -2.9                | 2.59E-11                       | 2.33E-09                     | 2.1   | 3.25E-02             | 9.55E-02           |                                                  |
| Neuron_All vs. Brain pH               | 3.4      | 0.1              | 1.3                | 1.9                 | 7.72E-04                       | 1.16E-02                     | 0.6   | 5.60E-01             | 7.00E-01           | *                                                |
| Neuron_Interneuron vs. Brain pH       | 2.1      | 1.0              | -0.5               | 2.3                 | 7.89E-03                       | 5.52E-02                     | 3.9   | 9.81E-05             | 6.69E-04           | **                                               |
| Microglia vs. Brain pH                | -1.0     | 2.9              | -0.1               | 1.9                 | 5.41E-01                       | 7.91E-01                     | 3.5   | 4.66E-04             | 2.59E-03           | *                                                |
| Oligodendrocyte_Immature vs. Brain pH | -3.0     | 0.4              | -0.5               | 1.4                 | 1.40E-01                       | 3.71E-01                     | 3.0   | 2.68E-03             | 1.22E-02           |                                                  |
| <b>Age</b>                            |          |                  |                    |                     |                                |                              |       |                      |                    |                                                  |
| Neuron_All vs. Age                    | -1.9     | -2.1             | -1.2               | -1.2                | 1.57E-03                       | 2.02E-02                     | -4.3  | 2.27E-05             | 1.93E-04           | **                                               |
| Neuron_Interneuron vs. Age            | -3.4     | -0.5             | -2.5               | -2.5                | 2.91E-06                       | 6.56E-05                     | -6.5  | 2.10E-10             | 3.15E-09           | **                                               |
| Neuron_Projection vs. Age             | -2.8     | -3.7             | -0.5               | -3.1                | 1.61E-06                       | 4.83E-05                     | -7.5  | 2.93E-13             | 7.33E-12           | **                                               |
| Oligodendrocyte vs. Age               | 1.8      | 1.2              | 0.3                | 3.1                 | 2.74E-03                       | 2.74E-02                     | 1.6   | 1.02E-01             | 2.25E-01           | *                                                |
| Oligodendrocyte_Immature vs. Age      | -3.7     | -4.7             | -0.2               | -4.5                | 5.98E-11                       | 2.69E-09                     | -11.0 | 3.32E-25             | 2.49E-23           | **                                               |
| <b>PMI</b>                            |          |                  |                    |                     |                                |                              |       |                      |                    |                                                  |
| Oligodendrocyte vs. PMI               | -3.6     | -3.6             | -1.6               | -0.5                | 2.23E-05                       | 4.02E-04                     | -4.1  | 4.70E-05             | 3.36E-04           | **                                               |
| Endothelial vs. PMI                   | -2.0     | -0.8             | 0.4                | -0.1                | 5.51E-02                       | 2.36E-01                     | -3.9  | 1.32E-04             | 8.60E-04           | *                                                |
| Microglia vs. PMI                     | -1.0     | -1.5             | -1.2               | -0.7                | 9.72E-02                       | 3.05E-01                     | -3.5  | 5.15E-04             | 2.76E-03           | *                                                |
| Oligodendrocyte_Immature vs. PMI      | 3.5      | 1.0              | 1.6                | -0.4                | 4.81E-03                       | 4.33E-02                     | -0.4  | 6.86E-01             | 8.04E-01           |                                                  |
| Neuron_Projection vs. PMI             | 3.9      | 1.6              | -0.2               | -1.2                | 2.28E-03                       | 2.56E-02                     | 3.1   | 1.97E-03             | 9.24E-03           | **                                               |
| Neuron_All vs. PMI                    | 2.5      | 1.8              | -0.4               | 0.0                 | 1.74E-02                       | 9.81E-02                     | 2.6   | 1.10E-02             | 3.88E-02           | *                                                |
| <b>Diagnosis:</b>                     |          |                  |                    |                     |                                |                              |       |                      |                    |                                                  |
| Astrocyte vs. Diagnosis_MDD           | -2.6     | -1.0             |                    |                     | 5.88E-03                       | 4.81E-02                     |       |                      |                    |                                                  |
| Neuron_All vs. Diagnosis_BP           | -0.9     | -0.7             |                    |                     | 2.46E-01                       | 5.39E-01                     | 2.6   | 8.44E-03             | 3.17E-02           |                                                  |
| RBC vs. Diagnosis_Schiz               | -1.2     | 0.1              | -1.0               | -0.5                | 2.04E-01                       | 4.96E-01                     | -2.5  | 1.41E-02             | 4.71E-02           | *                                                |
| <b>Gender:</b>                        |          |                  |                    |                     |                                |                              |       |                      |                    |                                                  |
| Neuron_Interneuron vs. GenderFemale   | -0.9     | 0.0              | 0.7                | 0.3                 | 6.65E-01                       | 9.06E-01                     | -2.5  | 1.20E-02             | 4.09E-02           |                                                  |
| Neuron_Projection vs. GenderFemale    | 1.0      | -0.3             | -0.4               | 1.6                 | 3.60E-01                       | 6.46E-01                     | -2.5  | 1.11E-02             | 3.88E-02           |                                                  |



419 **Figure 4. Cell content predictions derived from microarray data match known relationships between**  
420 **subject variables and brain tissue cell content.** Boxplots represent the median and interquartile range,  
421 with whiskers illustrating either the full range of the data or 1.5x the interquartile range. **A.** Within the  
422 CMC dataset, cortical tissue samples that were dissected to only contain gray matter (PITT) show lower  
423 predicted oligodendrocyte and microglia content and more neurons and vasculature (bars:  $\beta \pm SE$ ,  
424 red/blue:  $p < 0.05$ ). **B.** Subjects who died in a manner that involved exsanguination had a notably low red  
425 blood cell index in both the Pritzker ( $p = 0.00056$ ) and Narayan *et al.* datasets ( $p = 0.052$ \*trend). **C.** The  
426 presence of prolonged hypoxia around the time of death, as indicated by high agonal factor score, was  
427 associated with a large increase in the endothelial cell index ( $p = 2.85e-07$ ) matching previous  
428 demonstrations of cerebral angiogenesis, activation, and proliferation in low oxygen environments (45).  
429 **D.** High agonal factor was also associated with a clear decrease in neuronal indices ( $p = 3.58e-09$ )  
430 mirroring the vulnerability of neurons to low oxygen (46). **E.** Age was associated with a decrease in the  
431 neuronal indices ( $p = 0.000956$ ) which fits known decreases in gray matter density in the frontal cortex in  
432 aging humans (47). **F.** Major Depressive Disorder was associated with a moderate decrease in astrocyte  
433 index ( $p = 0.0118$ ), which fits what has been observed morphometrically (48). **G.** The most highly-  
434 replicated relationships between subject variables and predicted cortical cell content across all five of the  
435 post-mortem human datasets. Provided in the table are the T-stats for the effects (red=upregulation,  
436 blue=downregulation), derived from a larger linear model controlling for confounds (**Equation 1,**  
437 **Equation 2, Equation 3**), as well as the nominal p-values from the meta-analysis of the results across the  
438 four microarray studies, and p-values following multiple-comparisons correction (q-value). Only effects  
439 that had a  $q < 0.05$  in either our meta-analysis or the large CMC RNA-Seq dataset are included in the  
440 table. Asterisks denote effects that had consistent directionality in the meta-analysis and CMC dataset (\*)  
441 or consistent directionality and  $q < 0.05$  in both datasets (\*\*). Please note that lower pH and higher  
442 agonal factor are both indicators of greater hypoxia prior to death, but have an inverted relationship and  
443 therefore show opposing relationships with the cell type indices.

444  
445 **Age:** In the Pritzker dataset, age was associated with a moderate decrease in two of the neuronal  
446 indices (Neuron\_Interneuron vs. Age:  $\beta = -0.00291$ ,  $p = 0.000956$ ; Neuron\_Projection Neuron vs. Age:  $\beta = -$   
447  $0.00336$ ,  $p = 0.00505$ ) and this was strongly replicated in the large CMC RNA-Seq dataset (Neuron\_All vs.  
448 Age:  $\beta = -0.00497$ ,  $p = 2.27e-05$ ; Neuron\_Projection Neuron vs. Age:  $\beta = -0.00612$ ,  $p = 2.93e-13$ ;  
449 Neuron\_Interneuron vs. Age:  $\beta = -0.00591$ ,  $p = 2.10e-10$ ). A similar decrease in predicted neuronal content  
450 was seen in all three of the smaller human post-mortem datasets (Neuron\_All vs. Age (meta-analysis:  $b = -$   
451  $0.00415$ ,  $p = 1.57e-03$ ): GSE53987:  $\beta = -0.00722$ ,  $p = 0.0432$ , Neuron\_Interneuron vs. Age (meta-analysis:  
452  $b = -0.00335$ ,  $p = 2.91e-06$ ): GSE21138:  $\beta = -0.00494$ ,  $p = 0.0173$ , GSE21935:  $\beta = -0.00506$ ,  $p = 0.0172$ ,  
453 Neuron\_Projection vs. Age (meta-analysis:  $b = -0.00449$ ,  $p = 1.61e-06$ ): GSE53987:  $\beta = -0.0103$ ,  
454  $p = 0.000497$ , GSE21138:  $\beta = -0.00763$ ,  $p = 0.00386$ ). This result mirrors known decreases in gray matter  
455 density in the frontal cortex in aging humans (47), as well as age-related sub-region specific decreases in  
456 frontal neuron numbers in primates (49) and rats (50).



## Running Head: PREDICTING CELL TYPE BALANCE

457 There was a consistent decrease in the immature oligodendrocyte index in relationship to age across  
458 datasets (Oligodendrocyte\_Immature vs. Age (meta-analysis:  $b=-0.00514$ ,  $p=5.98e-11$ ): Pritzker:  $\beta=-$   
459  $0.00432$ ,  $p=0.000354$ , GSE21138:  $\beta=-0.00721$ ,  $p=5.73e-05$ , GSE53987:  $\beta=-0.00913$ ,  $p=1.85e-05$ ; CMC:  
460  $\beta=-0.00621$ ,  $p=3.32e-25$ ), which seems intuitive, but actually contradicts animal studies on the topic (51).  
461 Since the validation of the immature oligodendrocyte index was relatively weak (**Suppl. Section 7.2**), this  
462 result should perhaps be considered with caution.

463 In some datasets, there also appeared to be an increase in the oligodendrocyte index with age  
464 (Oligodendrocyte vs. Age (meta-analysis:  $b=0.00343$ ,  $p=2.74e-03$ ): GSE21138,  $\beta=0.00957$ ,  $p=0.00349$ )  
465 which, at initial face value, seems to contrast with well-replicated observations that frontal white matter  
466 decreases with age in human imaging studies (47,52,53). However, it is worth noting that several  
467 histological studies in aging primates suggest that brain regions that are experiencing demyelination with  
468 age actually show an *increasing* number of oligodendrocytes due to repair (51,54).

469 **PMI:** A prominent unexpected effect was a large decrease in the oligodendrocyte index with longer  
470 post-mortem interval (Oligodendrocyte vs. PMI (meta-analysis:  $b=-0.00764$ ,  $p=2.23e-05$ ): Pritzker:  $\beta=-$   
471  $0.00749$ ,  $p=0.000474$ , GSE53987:  $\beta=-0.0318$ ,  $p=0.000749$ ; CMC:  $\beta=-0.00759$ ,  $p=4.70e-05$ ). Upon further  
472 investigation, we found a publication documenting a 52% decrease in the fractional anisotropy of white  
473 matter with 24 hrs post-mortem interval as detected by neuroimaging (55), but to our knowledge the topic  
474 is otherwise not well studied. These changes were paralleled by a decrease in the endothelial index  
475 (CMC:  $\beta=-0.00542$ ,  $p=1.32e-04$ ) and microglial index (CMC:  $\beta=-0.00710$ ,  $p=5.15e-04$ ) and increase in  
476 the immature oligodendrocyte index (Oligodendrocyte\_Immature vs. PMI (meta-analysis:  $b=0.00353$ ,  
477  $p=4.81e-03$ ): Pritzker:  $\beta=0.00635$ ,  $p=0.000683$ ) and neuronal indices (Neuron\_All vs. PMI: Pritzker:  
478  $\beta=0.006997$ ,  $p=0.000982$ ; CMC:  $\beta=0.00386$ ,  $p=0.0110$ ; Neuron\_Projection vs. PMI (meta-analysis:  
479  $b=0.00456$ ,  $p=2.28e-03$ ): Pritzker:  $\beta=0.00708$ ,  $p=1.64e-04$ ; CMC:  $\beta=0.00331$ ,  $p=0.00197$ ). These results  
480 could arise from the zero-sum nature of transcriptomics analysis: due to the use of a standardized  
481 dissection size, RNA concentration, and data normalization, if there are large decreases in gene

## Running Head: PREDICTING CELL TYPE BALANCE

482 expression for one common variety of cell type (oligodendrocytes), then gene expression related to other  
483 cell types may appear to increase.

484 **Psychiatric Diagnosis:** Of most interest to us were potential changes in cell type balance in relation  
485 to psychiatric illness. In previous post-mortem morphometric studies, there was evidence of glial loss in  
486 the prefrontal cortex of subjects with Major Depressive Disorder, Bipolar Disorder, and Schizophrenia  
487 (reviewed in (56)). This decrease in glia, and particularly astrocytes, was replicated experimentally in  
488 animals exposed to chronic stress (57), and when induced pharmacologically, drove animals into a  
489 depressive-like condition (57). Replicating the results of (48), we observed a moderate decrease in  
490 astrocyte index in the prefrontal cortex of subjects with Major Depressive Disorder (meta-analysis:  
491  $b=0.132$ ,  $p=5.88e-03$ , Pritzker:  $\beta=-0.133$ ,  $p=0.0118$ , **Figure 4 F**), but did not see similar changes in the  
492 brains of subjects with Bipolar Disorder or Schizophrenia. We also observed a decrease in red blood cell  
493 index in association with Schizophrenia (CMC:  $\beta=-0.104$ ,  $p=0.0141$ ) which is tempting to ascribe to  
494 reduced blood flow due to hypofrontality (58). This decrease in red blood cell content could also arise due  
495 to psychiatric subjects having an increased probability of dying a violent death, but the effect remained  
496 present when we controlled for exsanguination, and therefore is likely to be genuinely tied to the illness  
497 itself.

498 **General Discussion:** Overall, these results indicate that statistical predictions of the cell content of  
499 samples effectively capture many known biological changes in cell type balance, and imply that within  
500 both chronic (age, diagnosis) and acute conditions (agonal, PMI, pH) there is substantial influences upon  
501 the relative representation of different cell types.

502 The effect of hypoxia within our results is particularly worth discussing in greater depth. It has been  
503 acknowledged for a long time that exposure to a hypoxic environment prior to death has a huge impact on  
504 gene expression in human post-mortem brains (e.g., (28,29,59–61)). This impact on gene expression is so  
505 large that up until recently the primary principal component of variation (PC1) in our data was assumed to  
506 represent the degree of hypoxia, and was sometimes even removed before performing diagnosis-related  
507 analyses (e.g., (62)). These large effects of hypoxia on gene expression were hypothesized to be partially

## Running Head: PREDICTING CELL TYPE BALANCE

508 mediated by neuronal necrosis (63) and lactic acidosis (60). However, the magnitude of the effect of  
509 hypoxia was still puzzling, especially when compared to the much more moderate effects of post-mortem  
510 interval (even when ranging from 8-40+ hrs). Our current analysis provides an explanation for this  
511 discrepancy, since it is clear from our results that the brains of our subjects are *actively compensating* for  
512 a hypoxic environment prior to death by altering the balance or overall transcriptional activity of support  
513 cells and neurons. The differential effects of hypoxia on neurons and glial cells have been studied since  
514 the 1960's (64), but to our knowledge this is the first time that anyone has related the large effects of  
515 hypoxia in post-mortem transcriptomic data to a corresponding upregulation in the transcriptional activity  
516 of vascular cell types (45).

517         This connection is important for understanding why results associating gene expression and  
518 psychiatric illness in human post-mortem tissue sometimes do not replicate. If a study contains mostly  
519 tissue from individuals who experienced greater hypoxia before death (e.g., hospital care with artificial  
520 respiration or coma), then differential expression analyses are likely to inadvertently focus on  
521 neuropsychiatric effects in support cell types, whereas a study that mostly contains tissue from individuals  
522 who died a fast death (e.g., myocardial infarction) will emphasize the neuropsychiatric effects in neurons.  
523 That said, although both indicators of perimortem hypoxia (agonal factor and pH) showed similar strong  
524 relationships with cell type balance, we recommend caution when interpreting the relationship between  
525 pH and cell type in tissue from psychiatric subjects, as pH can indicate other biological changes besides  
526 hypoxia. For example, there are small consistent decreases in pH associated with Bipolar Disorder even in  
527 live subjects (65–67) and metabolic changes associated with pH are theorized to play an important role in  
528 Schizophrenia (61). Therefore, the relationship between pH and cell type balance may be partially driven  
529 by a third variable (psychiatric illness or treatment). It is also possible that changes in tissue cell content  
530 could cause a change in pH (68).

531

532 **3.10 It is Difficult to Discriminate Between Changes in Cell Type Balance and Cell-Type Specific**  
533 **Function**

534 Gray matter density has been shown to decrease in the frontal cortex in aging humans (47), and  
535 frontal neuron numbers decrease in specific subregions in aging primates (49) and rats (50). However,  
536 many scientists would argue that age-related decreases in gray matter are primarily driven by synaptic  
537 atrophy instead of decreased cell number (69). This raised the question of whether the decline that we saw  
538 in neuronal cell indices with age was being largely driven by the enrichment of genes related to synaptic  
539 function in the index. More generally, it raised the question of how well cell type indices could  
540 discriminate changes in cell number from changes in cell-type function.

541 We examined this question using two methods. First, as a case study, we specifically examined the  
542 relationship between age and the functional annotation for genes found in the Neuron\_All index in more  
543 depth. We found that transcripts from functional clusters that seemed distinctly unrelated to  
544 dendritic/axonal functions still showed an average decrease in expression with age ( $T(40)=-2.7566$ ,  
545  $p=0.008756$ ), but this decrease was larger for transcripts clearly associated with dendritic/axonal-related  
546 functions ( $T(28)=-4.5612$ ,  $p=9.197e-05$ ; dendritic/axonal vs. non-dendritic/axonal:  $T(50.082)=2.3385$ ,  
547  $p=0.02339$ , **Suppl. Figure 11**). Based on this analysis, we conclude that synaptic atrophy could be  
548 partially driving age-related effects on neuronal cell type indices in the human prefrontal cortex dataset  
549 but are unlikely to fully explain the relationship.

550 Next, we decided to make the process of differentiating between altered cell type-specific functions  
551 and relative cell type balance more efficient. We used our cell type specific gene lists to construct gene  
552 sets in a file format (.gmt) compatible with the popular tool Gene Set Enrichment Analysis (39,40). Then,  
553 for the results from each subject variable within the Pritzker dataset, we compared the enrichment of the  
554 effects within gene sets defined by brain cell type to the enrichment seen within gene sets for other  
555 functional categories. In general, we found that gene sets for brain cell types tended to be the top result  
556 (most extreme normalized enrichment score, NES) for each of the subject variables that showed a strong  
557 relationship with cell type in our previous analyses (Agonal Factor vs.

558 “Neuron\_All\_Cahoy\_JNeuro\_2008”: NES=-2.46, p=0.00098, q=0.012, Brain pH vs.  
559 “Astrocyte\_All\_Cahoy\_JNeuro\_2008”: NES=-2.48, p=0.0011, q=0.014, MDD vs.  
560 “Astrocyte\_All\_Cahoy\_JNeuro\_2008”: NES=-2.60, p=0.0010, q=0.017, PMI vs.  
561 “GO\_OLIGODENDROCYTE\_DIFFERENTIATION”: NES=-2.42, p=0.00078, q=0.027; **Suppl. Table**  
562 **6**). Similarly, the relationship between the effects of age and neuron-specific gene expression was ranked  
563 #4, following the gene sets “GO\_SYNAPTIC\_SIGNALING”,  
564 “REACTOME\_TRANSMISSION\_ACROSS\_CHEMICAL\_SYNAPSES”,  
565 “REACTOME\_OPIOID\_SIGNALLING”, but each of them was assigned a similar p-value (p=0.001) and  
566 adjusted p-value (q=0.036). We conclude that it is important to consider cell type-specific expression  
567 during the analysis of macro-dissected brain microarray data above and beyond the consideration of  
568 specific functional pathways, and have submitted our .gmt files to the Broad Institute for addition to their  
569 curated gene sets in MSigDB to promote this form of analysis.

570

### 571 **3.11 Including Cell Content Predictions in the Analysis of Microarray Data Improves Model Fit** 572 **and Enhances the Detection of Diagnosis-Related Genes in Some Datasets**

573 Over the years, many researchers have been concerned that transcriptomic analyses of  
574 neuropsychiatric illness often produce non-replicable or contradictory results and, perhaps more  
575 disturbingly, are typically unable to replicate well-documented effects detected by other methods. We  
576 posited that this lack of sensitivity and replicability might be partially due to cell type variability in the  
577 samples, especially since such a large percentage of the principal components of variation in our samples  
578 were explained by neuron to glia ratio. Within the Pritzker dataset, we were particularly interested in  
579 controlling for cell type variability, because dissection may have differed between technical batches that  
580 were unevenly distributed across diagnosis categories (**Figure 5 A**). There was a similarly uneven  
581 distribution of dissection methods across diagnosis categories within the large CMC RNA-Seq dataset. In  
582 this dataset, the majority of the bipolar samples (75%) were collected by a brain bank that performed gray

## Running Head: PREDICTING CELL TYPE BALANCE

583 matter only dissections (PITT), whereas the control and schizophrenia samples were more evenly  
584 distributed across all three institutions (34).

585         We hypothesized that controlling for cell type while performing differential expression analyses  
586 in these datasets would improve our ability to detect previously-documented psychiatric effects on gene  
587 expression, especially psychiatric effects that were previously-identified within specific cell types, since  
588 these effects should not be mediated by psychiatric changes in overall cell type balance. To test the  
589 hypothesis, we first compiled a list of 130 strong, previously-documented relationships between  
590 Schizophrenia or Psychosis and gene expression in particular cell types in the human cortex, as detected  
591 by *in situ* hybridization or immunocytochemistry ((70–75) reviewed further in (19)) or by single-cell type  
592 laser capture microscopy (**Suppl. Figure 12, Suppl. Table 7** (1,76,77)).

593         As a comparison, we also considered lists of transcripts strongly-associated with Schizophrenia  
594 (78) and Bipolar Disorder (79) in meta-analyses of microarray data derived from human frontal cortical  
595 tissue (**Suppl. Figure 12, Suppl. Table 7**). The effects of psychiatric illness on the expression of these  
596 transcripts could be mediated by either psychiatric effects on cell type balance or by effects within  
597 individual cells. Therefore, controlling for cell type balance while performing differential expression  
598 analyses could detract from the detection of some psychiatric effects, but perhaps also enhance the  
599 detection of other psychiatric effects by controlling for large, confounding sources of noise (*e.g.*,  
600 dissection variability).

601         Next, we examined our ability to detect these previously-documented psychiatric effects using  
602 regression models of increasing complexity (**Figure 5 B**), including a standard model controlling for  
603 traditional co-variates (Model 2) and models controlling for cell type co-variates (Models 3-5).

## Running Head: PREDICTING CELL TYPE BALANCE

### A. Diagnosis Effects May Be Partially Confounded By Dissection Variability

| Pritzker: |             |
|-----------|-------------|
| Samples   | Batch*      |
| Control   | All Batches |
| BP, MDD   | 1-4, 9-13   |
| Schiz     | 5-8, 13-15  |

| CMC:     |                        |
|----------|------------------------|
| Samples  | Institution*           |
| Controls | All (PITT, MSSM, PENN) |
| BP       | PITT, MSSM             |
| Schiz    | All (PITT, MSSM, PENN) |

\*Batches partially defined by subject cohort \*PITT was a grey matter only dissection

| B. Model Complexity |                                                                  |
|---------------------|------------------------------------------------------------------|
| M1                  | <b>Base Model:</b> Diagnosis Only                                |
| M2                  | <b>Standard Model:</b> Diagnosis + Traditional Co-variables      |
| M3                  | Diagnosis + Most Prevalent Cell Types                            |
| M4                  | Diagnosis + Traditional Co-variables + Most Prevalent Cell Types |
| M5                  | Diagnosis + Traditional Co-variables + All Cell Types            |

### C. All Expressed Genes: Model Fit Improves After Adding Cell Type

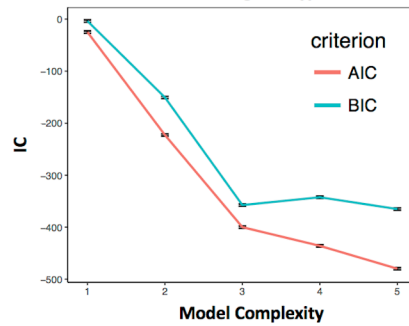

### D. Genes with Previously-Identified Psychiatric Effects: Model Fit Improves After Adding Cell Type

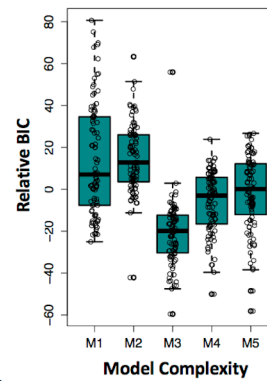

### E. Controlling for Cell Type Variability Enhances Detection of Psychiatric Effects in Some Datasets

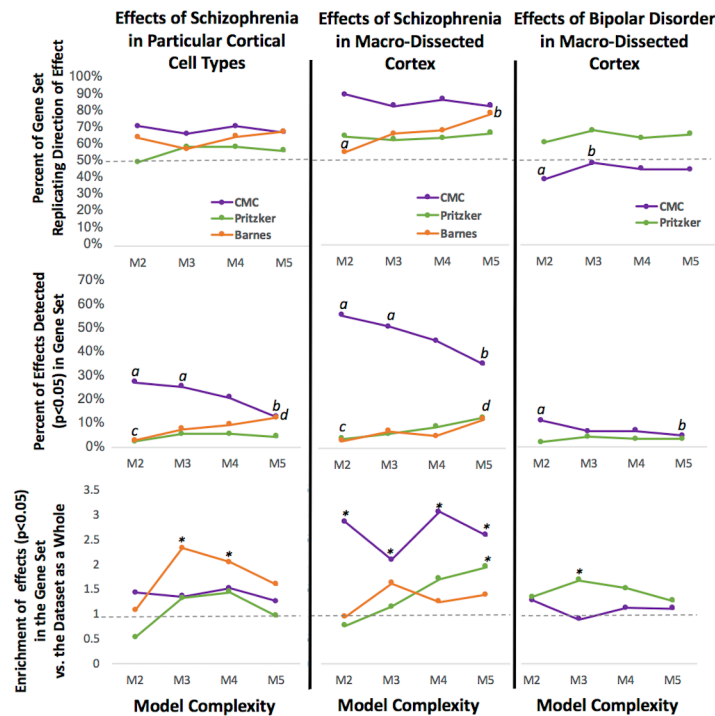



605 **Figure 5. Including Cell Content Predictions in the Analysis of Microarray Data Improves Model Fit**  
606 **and Enhances the Detection of Previously-Identified Diagnosis-Related Genes in Some Datasets. A.**  
607 *Diagnosis effects were likely to be partially confounded by dissection variability within the Pritzker and*  
608 *CMC datasets. B: We examined a series of differential expression models of increasing complexity,*  
609 *including a base model (M1), a standard model (M2), and three models that included cell type co-*  
610 *variates (M3-M5). C-D. Model fit improved with the addition of cell type (M1/M2 vs. M3-M5) when*  
611 *examining either C. all expressed genes in the dataset (example from CMC: points= AVE +/-SE). D.*  
612 *genes with previously-documented relationships with psychiatric illness in particular cell types (example*  
613 *from Pritzker: BIC values for all models for each gene were centered prior to analysis. Boxes represent*  
614 *the median and interquartile range of the data). E. Evaluating the replication of previously-observed*  
615 *psychiatric effects (Suppl. Figure 12) in three datasets (Pritzker, CMC, and Barnes) using a standard*  
616 *differential expression model (M2) vs. models that include cell type co-variates (M3-5). Letters (a vs. b, c*  
617 *vs. d) denote significant model comparisons (Fisher's exact test:  $p < 0.05$ ). Top graphs: The percentage of*  
618 *genes (y-axis: 0-1) replicating the direction of previously-documented psychiatric effects on cortical gene*  
619 *expression sometimes increases with the addition of cell type to the model ( $p < 0.05$ : Barnes (effects of*  
620 *Schiz): M2 vs. M5, CMC (effects of Bipolar Disorder): M2 vs. M3). Middle graphs: The detection of*  
621 *previously-identified psychiatric effects on gene expression ( $p < 0.05$  & replicated direction of effect)*  
622 *increases with the addition of cell type to the model in some datasets ( $p < 0.05$ , Barnes: M2 vs. M5,*  
623 *Pritzker: M2 vs. M5) but decreases in others ( $p < 0.05$ , CMC: M2 vs. M5, M3 vs. M5). Bottom graphs: In*  
624 *some datasets we see an enrichment of psychiatric effects ( $*p < 0.05$ ) in previously-identified psychiatric*  
625 *gene sets only after controlling for cell type (Barnes: M3, M4, Pritzker: M5, M3). For the CMC dataset,*  
626 *we see an enrichment using all models ( $*p < 0.05$ ).*

627

628 We found that including predictions of cell type balance in our models assessing the effect of  
629 diagnosis on gene expression dramatically improved model fit as assessed by Akaike's Information  
630 Criterion (AIC) or Bayesian Information Criterion (BIC). These improvements were largest with the  
631 addition of the five most prevalent cell types to the model (M3, M4); the addition of less common cell  
632 types produced smaller gains (M5). These improvements were clear whether we considered the average  
633 model fit for all expressed genes (e.g., **Figure 5 C**) or just genes with previously-identified psychiatric  
634 effects (e.g., **Figure 5 D**).

635 However, models that included cell type were not necessarily superior at replicating previously-  
636 observed psychiatric effects on gene expression, even when examining psychiatric effects that were likely  
637 to be independent of changes in cell type balance. For each model, we quantified the percentage of genes  
638 replicating the previously-observed direction of effect in relationship to psychiatric illness, as well as the  
639 percentage of genes that replicated the effect using a common threshold for detection ( $p < 0.05$ ). Finally,  
640 we also looked at the enrichment of psychiatric effects ( $p < 0.05$ ) in each of the previously-documented



641 psychiatric gene sets in comparison to the other genes in our datasets (genes universally represented in all  
642 three datasets- Pritzker, CMC, Barnes).

643 In general, we found that the two datasets that had the most variability in gene expression related  
644 to cell type (Pritzker, Barnes) were more likely to replicate previously-documented psychiatric effects on  
645 gene expression when the differential expression model included cell type covariates. For example, in the  
646 Barnes dataset, adding cell type co-variates to the model increased our ability to detect effects of  
647 Schizophrenia that had been previously documented within particular cell types or macro-dissected tissue  
648 (**Figure 5E**, Fisher's exact test: M2 vs. M5,  $p < 0.05$  in both gene sets) and revealed an enrichment of  
649 Schizophrenia effects in genes with previously-documented psychiatric effects in particular cell types  
650 (Fisher's exact test  $p < 0.05$ : M3 & M4). In the Pritzker dataset, adding cell type co-variates to the model  
651 increased our ability to detect previously-documented effects of Schizophrenia in macrodissected tissue  
652 (M2 vs. M5:  $p < 0.05$ ) and revealed a significant enrichment of Schizophrenia and Bipolar effects in genes  
653 with previously-documented psychiatric effects in macro-dissected tissue (Fisher's exact test  $p < 0.05$ :  
654 Schizophrenia: M5, Bipolar: M3). This mirrored the results of another analysis that we had conducted  
655 suggesting that controlling for cell type increased the overlap between the top diagnosis results in the  
656 Pritzker dataset and previous findings in the literature as a whole (**Suppl. Section 7.3.4**).

657 In the large CMC RNA-Seq dataset, the rate of replication of previously-documented effects of  
658 Schizophrenia was already quite high using a standard differential expression model containing traditional  
659 co-variates (M2). Using a standard model, we could detect 27% of the previously-documented effects in  
660 cortical cell types and 55% of the previously-documented effects in macro-dissected tissue (with a  
661 replicated direction of effect and  $p < 0.05$ ). However, in contrast to what we had observed in the Pritzker  
662 and Barnes datasets, controlling for cell type *diminished* the ability to detect effects of Schizophrenia that  
663 had been previously-observed within particular cell types or macrodissected tissue in a manner that scaled  
664 with the number of co-variates included in the model (M2 or M3 vs. M5:  $p < 0.05$  for both gene sets),  
665 despite improvements in model fit parameters and a lack of significant relationship between  
666 Schizophrenia and any of the prevalent cell types. Including cell type co-variates in the model did not

## Running Head: PREDICTING CELL TYPE BALANCE

667 improve our ability to observe an enrichment of Schizophrenia effects in genes with previously-  
668 documented psychiatric effects in macro-dissected tissue (all models showed enrichment, M2-M5:  
669 Fisher's exact test  $p < 0.05$ ). Controlling for cell type slightly improved the replication of the direction of  
670 previously-documented Bipolar Disorder effects (Fisher's exact test: M2 vs. M3:  $p < 0.05$ ) in a manner that  
671 would seem appropriate due to the highly uneven distribution of bipolar samples across institutions and  
672 dissection methods, but even after this improvement the rate of replication was still no better than chance  
673 (48%), and, counterintuitively, the ability to successfully detect those effects still diminished in a manner  
674 that seemed to scale with the number of co-variates included in the model (Fisher's exact test: M2 vs. M5,  
675  $p < 0.05$ ). In a preliminary analysis of the two smaller human microarray datasets that were derived from  
676 gray-matter only dissections (GSE53987, GSE21138), the addition of cell type co-variates to differential  
677 expression models clearly diminished both the percentage of genes replicating the previously-documented  
678 direction of effect of Schizophrenia in particular cell types (Fisher's exact test: GSE21138: M2 vs. M4 or  
679 M5:  $p < 0.05$ , GSE53987: M2 vs. M4 or M5:  $p < 0.05$ ) and the ability to successfully detect previously-  
680 documented effects (Fisher's exact test: GSE21138: M2 vs. M4 or M5:  $p < 0.05$ ).

681 **General Discussion:** We found that including cell type indices as co-variates while running  
682 differential expression analyses helped improve our ability to detect previously-documented relationships  
683 between psychiatric illness and gene expression in human cortical datasets that were particularly affected  
684 by variability in cell type balance. This improvement was not seen in datasets that were less affected by  
685 variability in cell type balance, despite improvements in model fit and a lack of strong multicollinearity  
686 between diagnosis and the cell type indices. This finding was initially surprising to us, but upon further  
687 consideration makes sense, as the cell type indices are multi-parameter gene expression variables.  
688 Therefore, there is increased risk of overfitting when modeling the data for any particular gene. We  
689 conclude that the addition of cell type covariates to differential expression models is only recommended  
690 when there is a particularly large amount of variability in the dataset associated with cell type balance, or  
691 when there is strong reason to believe that technical variation associated with cell type (such as  
692 dissection) may be highly confounding in the result. We strongly recommend that model selection while

## Running Head: PREDICTING CELL TYPE BALANCE

693 conducting differential expression analyses should be considered carefully, and evaluated not only in  
694 terms of fit parameters but also validity and interpretability.

695         Regarding the importance of model selection for interpretability, it is worth noting that an  
696 important difference between our final analysis methods and those used by some previous researchers  
697 (*e.g.*, 10–12) was the lack of cell type interaction terms included in our models (*e.g.*, Diagnosis\*Astrocyte  
698 Index). Theoretically, the addition of cell type interaction terms should allow the researcher to statistically  
699 interrogate cell-type differentiated diagnosis effects because samples that contain more of a particular cell  
700 type should exhibit more of that cell type’s respective diagnosis effect. Versions of this form of analysis  
701 have been successful in other investigations (*e.g.*, (11,12,80)) but we were not able to validate the method  
702 using a variety of model specifications and our database of previously-documented relationships with  
703 diagnosis in prefrontal cell types. Upon consideration, we realized that these negative results were  
704 difficult to interpret because significant diagnosis\*cell type interactions should only become evident if the  
705 effect of diagnosis in a particular cell type is different from what is occurring in all cell types on average.  
706 For genes with expression that is reasonably specific to a particular cell type (*e.g.*, GAD1, PVALB), the  
707 overall average diagnosis effect may already largely reflect the effect within that cell type and the  
708 respective interaction term will not be significantly different, even though the disease effect is clearly  
709 tracking the balance of that cell population. In the end, we decided that the addition of interaction terms to  
710 our models was not demonstrably worth the associated decrease in overall model fit and statistical power.  
711 For public use we have released the full differential expression results for each dataset analyzed using the  
712 different models discussed above (**Suppl. Table 8-Suppl. Table 12**).

### 713 **4. Conclusion and Future Directions**

714         In this manuscript, we have demonstrated that the statistical cell type index is a relatively simple  
715 manner of interrogating cell-type specific expression in transcriptomic datasets from macro-dissected  
716 human brain tissue. We find that statistical estimations of cell type balance almost fully account for the  
717 top principal components of variation in microarray data derived from macro-dissected brain tissue

## Running Head: PREDICTING CELL TYPE BALANCE

718 samples, far surpassing the effects of traditional subject variables (post-mortem interval, hypoxia, age,  
719 gender). Indeed, our results suggest that many variables of medical interest are themselves accompanied  
720 by strong changes in cell type specific gene expression in naturally-observed human brains. We find that  
721 within both chronic (age, sex, diagnosis) and acute conditions (agonal, PMI, pH) there may be substantial  
722 changes in the relative representation of different cell types. Thus, accounting for demography at the  
723 cellular population level can be as important for the interpretation of microarray data as cell-level  
724 functional regulation. This form of data deconvolution was useful for identifying the subtler effects of  
725 psychiatric illness within our samples, divulging the decrease in astrocytes that is known to occur in  
726 Major Depressive Disorder and the decrease in red blood cell content in the frontal cortex in  
727 Schizophrenia, resembling known fMRI hypofrontality. This form of data deconvolution may also aid in  
728 the detection of psychiatric effects while conducting differential expression analyses in datasets that have  
729 highly-variable cell content.

730         These results touch upon the fundamental question as to whether organ-level function responds to  
731 challenge by changing the biological states of individual cells or the life and death of different cell  
732 populations. To reach such a sweeping perspective in human brain tissue using classic cell biology  
733 methods would require epic efforts in labeling, cell sorting, and counting. We have demonstrated that  
734 scientists can approximate this vantage point using an elegant, supervised signal decomposition exploiting  
735 increasingly available genomic data. However, it should be noted that, similar to other forms of functional  
736 annotation, cell type indices are best treated as a hypothesis-generation tool instead of a final conclusion  
737 regarding tissue cell content. We have demonstrated the utility of cell type indices for detecting large-  
738 scale alterations in cell content in relationship with known subject variables in post-mortem tissue. We  
739 have not tested the sensitivity of the technique for detecting smaller effects or the validity under all  
740 circumstances or non-cortical tissue types. Likewise, while using this technique it is impossible to  
741 distinguish between alterations in cell type balance and cell-type specific transcriptional activity: when a  
742 sample shows a higher value of a particular cell type index, it could have a larger number of such cells, or  
743 each cell could have produced more of its unique group of transcripts, via a larger cell body, slower

## Running Head: PREDICTING CELL TYPE BALANCE

744 mRNA degradation, or an overall change in transcription rate. In this regard, the index that we calculate  
745 does not have a specific interpretation; rather it is a holistic property of the cell populations, the “neuron-  
746 ness” or “microglia-ness” of the sample. Such an abstract index represents the ecological shifts inferred  
747 from the pooled transcriptome. That said, our cell type indices do have real biological meaning - they can  
748 be interpreted in a known system of cell type taxonomy. When single-cell genomic data uncovers new  
749 cell types (e.g., the Allen Brain Atlas cellular taxonomy initiative (81)) or meta-analyses refine the list of  
750 genes defined that have cell-type specific expression (e.g., (82)), our indices will surely evolve with these  
751 new classification frameworks, but the power of the approach will remain, in that we can disentangle the  
752 intrinsic changes of individual genes from the population-level shifts of major cell types.

753 Our work drives home the fact that any comprehensive theory of psychiatric illness needs to  
754 account for the dichotomy between the health of individual cells and that of their ecosystem. We found  
755 that the functional changes accompanying psychiatric illness in the cortex occurred both at the level of  
756 cell population shifts (decreased astrocytic presence and red blood cell count) and at the level of intrinsic  
757 gene regulation not explained by population shifts. A similar conclusion regarding the importance of cell  
758 type balance in association with psychiatric illness was recently drawn by our collaborators (e.g.,(83))  
759 using a similar technique to analyze RNA-Seq data from the anterior cingulate cortex. In the future, we  
760 plan to use our technique to re-analyze many other large transcriptomic datasets with the hope of gaining  
761 better insight into psychiatric disease. This application of our technique seems particularly important in  
762 light of recent evidence linking disrupted neuroimmunity (84) and neuroglia (e.g., (48,57,85)) to  
763 psychiatric illness, as well as growing evidence that growth factors with cell type specific effects play an  
764 important role in depressive illness and emotional regulation (for a review see (23,86)).

765 In conclusion, we have found this method to be a valuable addition to traditional functional  
766 ontology tools as a manner of improving the interpretation of transcriptomic results. For the benefit of  
767 other researchers, we have made our database of brain cell type specific genes (**Suppl. Table 1**,  
768 <https://sites.google.com/a/umich.edu/megan-hastings-hagenauer/home/cell-type-analysis>) and code for  
769 conducting cell type analyses publicly available in the form of a downloadable R package

770 (<https://github.com/hagenaue/BrainInABlender>) and we are happy to assist researchers in their usage for  
771 pursuing better insight into psychiatric illness and neurological disease.

772

## 773 **5. Acknowledgements**

774 We thank all members of the Pritzker Consortium (especially the University of California, Irvine  
775 Brain Bank staff), Drs. Adriana Medina and David Krolewski for brain dissections and methodological  
776 input, and Dr. Simon Evans, Sharon Burke and Mary Hoverstein for their involvement in the initial  
777 mRNA extraction and microarrays. Grace Hsienyuan Chang, Jennifer Fitzpatrick, LeAnn Fitzpatrick, Jim  
778 Stewart, Tom Dixon, Doug Smith, Andy Lin, and Manhong Dai were invaluable for maintaining our  
779 databases of clinical information and biological specimens. Drs. Elyse Aurbach, Katherine Prater,  
780 Kathryn Hilde, Fan Meng, Lilah Toker, Mark Reimers, and Angela O'Connor provided insightful advice  
781 and feedback regarding the methodology or manuscript. Our undergraduate research assistants Isabelle  
782 Birt, Alek Pankonin, and Daniela Romero Vargas helped compile the Allen Brain Atlas data, annotate and  
783 upload code, create the BrainInABlender R package, and provide editorial assistance. Finally, we would  
784 like to thank our reviewers, whose insightful feedback helped inspire several particularly useful analyses,  
785 leading us to a stronger set of conclusions.

786 **6. References**

- 787 1. Arion D, Corradi JP, Tang S, Datta D, Boothe F, He A, et al. Distinctive transcriptome alterations of  
788 prefrontal pyramidal neurons in schizophrenia and schizoaffective disorder. *Mol Psychiatry*. 2015  
789 Nov;20(11):1397–405.
- 790 2. Darmanis S, Sloan SA, Zhang Y, Enge M, Caneda C, Shuer LM, et al. A survey of human brain  
791 transcriptome diversity at the single cell level. *Proc Natl Acad Sci U S A*. 2015 Jun  
792 9;112(23):7285–90.
- 793 3. Lake BB, Ai R, Kaeser GE, Salathia NS, Yung YC, Liu R, et al. Neuronal subtypes and diversity  
794 revealed by single-nucleus RNA sequencing of the human brain. *Science*. 2016 Jun  
795 24;352(6293):1586–90.
- 796 4. Choi KH, Elashoff M, Higgs BW, Song J, Kim S, Sabunciyani S, et al. Putative psychosis genes in  
797 the prefrontal cortex: combined analysis of gene expression microarrays. *BMC Psychiatry*.  
798 2008;8:87.
- 799 5. Evans SJ, Choudary PV, Neal CR, Li JZ, Vawter MP, Tomita H, et al. Dysregulation of the  
800 fibroblast growth factor system in major depression. *Proc Natl Acad Sci U S A*. 2004 Oct  
801 26;101(43):15506–11.
- 802 6. Abbas AR, Wolslegel K, Seshasayee D, Modrusan Z, Clark HF. Deconvolution of blood microarray  
803 data identifies cellular activation patterns in systemic lupus erythematosus. *PloS One*.  
804 2009;4(7):e6098.
- 805 7. Chikina M, Zaslavsky E, Sealfon SC. CellCODE: a robust latent variable approach to differential  
806 expression analysis for heterogeneous cell populations. *Bioinforma Oxf Engl*. 2015 May  
807 15;31(10):1584–91.
- 808 8. Gaujoux R, Seoighe C. CellMix: a comprehensive toolbox for gene expression deconvolution.  
809 *Bioinforma Oxf Engl*. 2013 Sep 1;29(17):2211–2.
- 810 9. Shen-Orr SS, Gaujoux R. Computational deconvolution: extracting cell type-specific information  
811 from heterogeneous samples. *Curr Opin Immunol*. 2013 Oct;25(5):571–8.
- 812 10. Capurro A, Bodea L-G, Schaefer P, Luthi-Carter R, Perreau VM. Computational deconvolution of  
813 genome wide expression data from Parkinson’s and Huntington’s disease brain tissues using  
814 population-specific expression analysis. *Front Neurosci*. 2014;8:441.
- 815 11. Kuhn A, Kumar A, Beilina A, Dillman A, Cookson MR, Singleton AB. Cell population-specific  
816 expression analysis of human cerebellum. *BMC Genomics*. 2012;13:610.
- 817 12. Kuhn A, Thu D, Waldvogel HJ, Faull RLM, Luthi-Carter R. Population-specific expression analysis  
818 (PSEA) reveals molecular changes in diseased brain. *Nat Methods*. 2011 Nov;8(11):945–7.
- 819 13. Cahoy JD, Emery B, Kaushal A, Foo LC, Zamanian JL, Christopherson KS, et al. A transcriptome  
820 database for astrocytes, neurons, and oligodendrocytes: a new resource for understanding brain  
821 development and function. *J Neurosci Off J Soc Neurosci*. 2008 Jan 2;28(1):264–78.



Running Head: PREDICTING CELL TYPE BALANCE

- 822 14. Daneman R, Zhou L, Agalliu D, Cahoy JD, Kaushal A, Barres BA. The mouse blood-brain barrier  
823 transcriptome: a new resource for understanding the development and function of brain endothelial  
824 cells. *PloS One*. 2010;5(10):e13741.
- 825 15. Doyle JP, Dougherty JD, Heiman M, Schmidt EF, Stevens TR, Ma G, et al. Application of a  
826 translational profiling approach for the comparative analysis of CNS cell types. *Cell*. 2008 Nov  
827 14;135(4):749–62.
- 828 16. Sugino K, Hempel CM, Miller MN, Hattox AM, Shapiro P, Wu C, et al. Molecular taxonomy of  
829 major neuronal classes in the adult mouse forebrain. *Nat Neurosci*. 2006 Jan;9(1):99–107.
- 830 17. Zeisel A, Muñoz-Manchado AB, Codeluppi S, Lönnerberg P, La Manno G, Juréus A, et al. Brain  
831 structure. Cell types in the mouse cortex and hippocampus revealed by single-cell RNA-seq.  
832 *Science*. 2015 Mar 6;347(6226):1138–42.
- 833 18. Zhang Y, Chen K, Sloan SA, Bennett ML, Scholze AR, O’Keefe S, et al. An RNA-sequencing  
834 transcriptome and splicing database of glia, neurons, and vascular cells of the cerebral cortex. *J*  
835 *Neurosci Off J Soc Neurosci*. 2014 Sep 3;34(36):11929–47.
- 836 19. Lewis DA, Sweet RA. Schizophrenia from a neural circuitry perspective: advancing toward rational  
837 pharmacological therapies. *J Clin Invest*. 2009 Apr;119(4):706–16.
- 838 20. Lynch JC. The Cerebral Cortex. In: *Fundamental Neuroscience*. 2nd ed. Philadelphia: Churchill  
839 Livingstone; 2002. p. 505–20.
- 840 21. Hutchins DE, Naftel JP, Ard MD. The cell biology of neurons and glia. In: *Fundamental*  
841 *Neuroscience*. 2nd ed. Philadelphia: Churchill Livingstone; 2002. p. 15–36.
- 842 22. Bergers G, Song S. The role of pericytes in blood-vessel formation and maintenance. *Neuro-Oncol*.  
843 2005 Oct;7(4):452–64.
- 844 23. Duman RS, Monteggia LM. A neurotrophic model for stress-related mood disorders. *Biol*  
845 *Psychiatry*. 2006 Jun 15;59(12):1116–27.
- 846 24. Doss JF, Corcoran DL, Jima DD, Telen MJ, Dave SS, Chi J-T. A comprehensive joint analysis of  
847 the long and short RNA transcriptomes of human erythrocytes. *BMC Genomics*. 2015;16(1):952.
- 848 25. Hawrylycz MJ, Lein ES, Guillozet-Bongaarts AL, Shen EH, Ng L, Miller JA, et al. An anatomically  
849 comprehensive atlas of the adult human brain transcriptome. *Nature*. 2012 Sep 20;489(7416):391–9.
- 850 26. Allen Brain Atlas. Technical White Paper: Case qualification and donor profiles, v.7 [Internet].  
851 2013. Available from: [help.brain-map.org](http://help.brain-map.org)
- 852 27. Allen Brain Atlas. Technical White Paper: Microarray Survey, v.7 [Internet]. 2013. Available from:  
853 [help.brain-map.org](http://help.brain-map.org)
- 854 28. Li JZ, Vawter MP, Walsh DM, Tomita H, Evans SJ, Choudary PV, et al. Systematic changes in  
855 gene expression in postmortem human brains associated with tissue pH and terminal medical  
856 conditions. *Hum Mol Genet*. 2004 Mar 15;13(6):609–16.



Running Head: PREDICTING CELL TYPE BALANCE

- 857 29. Tomita H, Vawter MP, Walsh DM, Evans SJ, Choudary PV, Li J, et al. Effect of agonal and  
858 postmortem factors on gene expression profile: quality control in microarray analyses of  
859 postmortem human brain. *Biol Psychiatry*. 2004 Feb 15;55(4):346–52.
- 860 30. Lanz TA, Joshi JJ, Reinhart V, Johnson K, Grantham LE, Volfson D. STEP levels are unchanged in  
861 pre-frontal cortex and associative striatum in post-mortem human brain samples from subjects with  
862 schizophrenia, bipolar disorder and major depressive disorder. *PLoS One*. 2015;10(3):e0121744.
- 863 31. Barnes MR, Huxley-Jones J, Maycox PR, Lennon M, Thornber A, Kelly F, et al. Transcription and  
864 pathway analysis of the superior temporal cortex and anterior prefrontal cortex in schizophrenia. *J*  
865 *Neurosci Res*. 2011 Aug;89(8):1218–27.
- 866 32. Narayan S, Tang B, Head SR, Gilmartin TJ, Sutcliffe JG, Dean B, et al. Molecular profiles of  
867 schizophrenia in the CNS at different stages of illness. *Brain Res*. 2008 Nov 6;1239:235–48.
- 868 33. Fasold M, Binder H. AffyRNADegradation: control and correction of RNA quality effects in  
869 GeneChip expression data. *Bioinformatics*. 2013 Jan;29(1):129–31.
- 870 34. Fromer M, Roussos P, Sieberts SK, Johnson JS, Kavanagh DH, Perumal TM, et al. Gene expression  
871 elucidates functional impact of polygenic risk for schizophrenia. *Nat Neurosci*. 2016  
872 Nov;19(11):1442–53.
- 873 35. Viechtbauer W. Conducting Meta-Analyses in R with The metafor Package. *J Stat Softw*. 2010 Aug  
874 1;36.
- 875 36. Pollard KS, Dudoit S, Laan MJ van der. Multiple Testing Procedures: the multtest Package and  
876 Applications to Genomics. In: *Bioinformatics and Computational Biology Solutions Using R and*  
877 *Bioconductor* [Internet]. Springer, New York, NY; 2005 [cited 2017 Oct 13]. p. 249–71. (Statistics  
878 for Biology and Health). Available from: [https://link.springer.com/chapter/10.1007/0-387-29362-](https://link.springer.com/chapter/10.1007/0-387-29362-0_15)  
879 [0\\_15](https://link.springer.com/chapter/10.1007/0-387-29362-0_15)
- 880 37. Huang DW, Sherman BT, Zheng X, Yang J, Imamichi T, Stephens R, et al. Extracting biological  
881 meaning from large gene lists with DAVID. *Curr Protoc Bioinforma Ed Board Andreas Baxevanis*  
882 *Al*. 2009 Sep;Chapter 13:Unit 13.11.
- 883 38. Huang DW, Sherman BT, Lempicki RA. Systematic and integrative analysis of large gene lists  
884 using DAVID bioinformatics resources. *Nat Protoc*. 2009;4(1):44–57.
- 885 39. Subramanian A, Tamayo P, Mootha VK, Mukherjee S, Ebert BL, Gillette MA, et al. Gene set  
886 enrichment analysis: a knowledge-based approach for interpreting genome-wide expression profiles.  
887 *Proc Natl Acad Sci U S A*. 2005 Oct 25;102(43):15545–50.
- 888 40. Mootha VK, Lindgren CM, Eriksson K-F, Subramanian A, Sihag S, Lehar J, et al. PGC-1alpha-  
889 responsive genes involved in oxidative phosphorylation are coordinately downregulated in human  
890 diabetes. *Nat Genet*. 2003 Jul;34(3):267–73.
- 891 41. Sergushichev A. An algorithm for fast preranked gene set enrichment analysis using cumulative  
892 statistic calculation. *bioRxiv* [Internet]. 2016 Jun 20; Available from:  
893 <http://biorxiv.org/content/early/2016/06/20/060012.abstract>
- 894 42. Carpenter MB. *Core Text of Neuroanatomy*. 4th ed. Baltimore, MD: Williams & Wilkins; 1991.

## Running Head: PREDICTING CELL TYPE BALANCE

- 895 43. Amaral DG, Scharfman HE, Lavenex P. The dentate gyrus: fundamental neuroanatomical  
896 organization (dentate gyrus for dummies). *Prog Brain Res.* 2007;163:3–22.
- 897 44. Sun N, Cassell MD. Intrinsic GABAergic neurons in the rat central extended amygdala. *J Comp*  
898 *Neurol.* 1993 Apr 15;330(3):381–404.
- 899 45. Li L, Welser JV, Dore-Duffy P, del Zoppo GJ, Lamanna JC, Milner R. In the hypoxic central  
900 nervous system, endothelial cell proliferation is followed by astrocyte activation, proliferation, and  
901 increased expression of the alpha 6 beta 4 integrin and dystroglycan. *Glia.* 2010 Aug;58(10):1157–  
902 67.
- 903 46. Banasiak KJ, Haddad GG. Hypoxia-induced apoptosis: effect of hypoxic severity and role of p53 in  
904 neuronal cell death. *Brain Res.* 1998 Jun 29;797(2):295–304.
- 905 47. Sowell ER, Peterson BS, Thompson PM, Welcome SE, Henkenius AL, Toga AW. Mapping cortical  
906 change across the human life span. *Nat Neurosci.* 2003 Mar;6(3):309–15.
- 907 48. Rajkowska G, Miguel-Hidalgo JJ, Wei J, Dilley G, Pittman SD, Meltzer HY, et al. Morphometric  
908 evidence for neuronal and glial prefrontal cell pathology in major depression. *Biol Psychiatry.* 1999  
909 May 1;45(9):1085–98.
- 910 49. Smith DE, Rapp PR, McKay HM, Roberts JA, Tuszynski MH. Memory impairment in aged  
911 primates is associated with focal death of cortical neurons and atrophy of subcortical neurons. *J*  
912 *Neurosci Off J Soc Neurosci.* 2004 May 5;24(18):4373–81.
- 913 50. Stranahan AM, Jiam NT, Spiegel AM, Gallagher M. Aging reduces total neuron number in the  
914 dorsal component of the rodent prefrontal cortex. *J Comp Neurol.* 2012 Apr 15;520(6):1318–26.
- 915 51. Peters A, Sethares C. Oligodendrocytes, their progenitors and other neuroglial cells in the aging  
916 primate cerebral cortex. *Cereb Cortex N Y N 1991.* 2004 Sep;14(9):995–1007.
- 917 52. Resnick SM, Pham DL, Kraut MA, Zonderman AB, Davatzikos C. Longitudinal magnetic  
918 resonance imaging studies of older adults: a shrinking brain. *J Neurosci Off J Soc Neurosci.* 2003  
919 Apr 15;23(8):3295–301.
- 920 53. Salat DH, Buckner RL, Snyder AZ, Greve DN, Desikan RSR, Busa E, et al. Thinning of the  
921 cerebral cortex in aging. *Cereb Cortex N Y N 1991.* 2004 Jul;14(7):721–30.
- 922 54. Peters A, Sethares C, Moss MB. HOW THE PRIMATE FORNIX IS AFFECTED BY AGE. *J*  
923 *Comp Neurol.* 2010 Oct 1;518(19):3962–80.
- 924 55. Shepherd TM, Flint JJ, Thelwall PE, Stanisz GJ, Mareci TH, Yachnis AT, et al. Postmortem interval  
925 alters the water relaxation and diffusion properties of rat nervous tissue--implications for MRI  
926 studies of human autopsy samples. *NeuroImage.* 2009 Feb 1;44(3):820–6.
- 927 56. Cotter DR, Pariante CM, Everall IP. Glial cell abnormalities in major psychiatric disorders: The  
928 evidence and implications. *Brain Res Bull.* 2001 Jul 15;55(5):585–95.
- 929 57. Banasr M, Duman RS. Glial loss in the prefrontal cortex is sufficient to induce depressive-like  
930 behaviors. *Biol Psychiatry.* 2008 Nov 15;64(10):863–70.

Running Head: PREDICTING CELL TYPE BALANCE

- 931 58. RAGLAND JD, YOON J, MINZENBERG MJ, CARTER CS. Neuroimaging of cognitive disability  
932 in schizophrenia: Search for a pathophysiological mechanism. *Int Rev Psychiatry Abingdon Engl.*  
933 2007 Aug;19(4):417–27.
- 934 59. Atz M, Walsh D, Cartagena P, Li J, Evans S, Choudary P, et al. Methodological considerations for  
935 gene expression profiling of human brain. *J Neurosci Methods.* 2007 Jul 30;163(2):295–309.
- 936 60. Vawter MP, Tomita H, Meng F, Bolstad B, Li J, Evans S, et al. Mitochondrial-related gene  
937 expression changes are sensitive to agonal-pH state: implications for brain disorders. *Mol*  
938 *Psychiatry.* 2006 Jul;11(7):615, 663–79.
- 939 61. Sequeira PA, Martin MV, Vawter MP. The first decade and beyond of transcriptional profiling in  
940 schizophrenia. *Neurobiol Dis.* 2012 Jan 1;45(1):23–36.
- 941 62. Li JZ, Bunney BG, Meng F, Hagenauer MH, Walsh DM, Vawter MP, et al. Circadian patterns of  
942 gene expression in the human brain and disruption in major depressive disorder. *Proc Natl Acad Sci*  
943 *U S A.* 2013 Jun 11;110(24):9950–5.
- 944 63. Weis S, Llenos IC, Dulay JR, Elashoff M, Martínez-Murillo F, Miller CL. Quality control for  
945 microarray analysis of human brain samples: The impact of postmortem factors, RNA  
946 characteristics, and histopathology. *J Neurosci Methods.* 2007 Sep 30;165(2):198–209.
- 947 64. Hamberger A, Hyden H. Inverse enzymatic changes in neurons and glia during increased function  
948 and hypoxia. *J Cell Biol.* 1963 Mar;16:521–5.
- 949 65. Kato T, Murashita J, Kamiya A, Shioiri T, Kato N, Inubushi T. Decreased brain intracellular pH  
950 measured by P-31-MRS in bipolar disorder: a confirmation in drug-free patients and correlation  
951 with white matter hyperintensity. *Eur Arch Psychiatry Clin Neurosci.* 1998 Dec;248(6):301–6.
- 952 66. Hamakawa H, Murashita J, Yamada N, Inubushi T, Kato N, Kato T. Reduced intracellular pH in the  
953 basal ganglia and whole brain measured by P-31-MRS in bipolar disorder. *Psychiatry Clin*  
954 *Neurosci.* 2004 Feb;58(1):82–8.
- 955 67. Johnson CP, Follmer RL, Oguz I, Warren LA, Christensen GE, Fiedorowicz JG, et al. Brain  
956 abnormalities in bipolar disorder detected by quantitative T1 rho mapping. *Mol Psychiatry.* 2015  
957 Feb;20(2):201–6.
- 958 68. Chesler M, Kraig R. Intracellular Ph of Astrocytes Increases Rapidly with Cortical Stimulation. *Am*  
959 *J Physiol.* 1987 Oct;253(4):R666–70.
- 960 69. Peters A, Sethares C, Luebke JI. Synapses are lost during aging in the primate prefrontal cortex.  
961 *Neuroscience.* 2008 Apr 9;152(4):970–81.
- 962 70. Guidotti A, Auta J, Davis JM, Di-Giorgi-Gerevini V, Dwivedi Y, Grayson DR, et al. Decrease in  
963 reelin and glutamic acid decarboxylase67 (GAD67) expression in schizophrenia and bipolar  
964 disorder: a postmortem brain study. *Arch Gen Psychiatry.* 2000 Nov;57(11):1061–9.
- 965 71. Hashimoto T, Volk DW, Eggan SM, Mirnics K, Pierri JN, Sun Z, et al. Gene expression deficits in a  
966 subclass of GABA neurons in the prefrontal cortex of subjects with schizophrenia. *J Neurosci Off J*  
967 *Soc Neurosci.* 2003 Jul 16;23(15):6315–26.

Running Head: PREDICTING CELL TYPE BALANCE

- 968 72. Volk DW, Austin MC, Pierri JN, Sampson AR, Lewis DA. Decreased glutamic acid  
969 decarboxylase67 messenger RNA expression in a subset of prefrontal cortical gamma-aminobutyric  
970 acid neurons in subjects with schizophrenia. *Arch Gen Psychiatry*. 2000 Mar;57(3):237–45.
- 971 73. Morris HM, Hashimoto T, Lewis DA. Alterations in somatostatin mRNA expression in the  
972 dorsolateral prefrontal cortex of subjects with schizophrenia or schizoaffective disorder. *Cereb*  
973 *Cortex N Y N* 1991. 2008 Jul;18(7):1575–87.
- 974 74. Volk D, Austin M, Pierri J, Sampson A, Lewis D. GABA transporter-1 mRNA in the prefrontal  
975 cortex in schizophrenia: decreased expression in a subset of neurons. *Am J Psychiatry*. 2001  
976 Feb;158(2):256–65.
- 977 75. Pandey GN, Dwivedi Y, Rizavi HS, Ren X, Pandey SC, Pesold C, et al. Higher expression of  
978 serotonin 5-HT(2A) receptors in the postmortem brains of teenage suicide victims. *Am J Psychiatry*.  
979 2002 Mar;159(3):419–29.
- 980 76. Pietersen CY, Mauney SA, Kim SS, Passeri E, Lim MP, Rooney RJ, et al. Molecular profiles of  
981 parvalbumin-immunoreactive neurons in the superior temporal cortex in schizophrenia. *J*  
982 *Neurogenet*. 2014 Jun;28(1–2):70–85.
- 983 77. Mauney SA, Pietersen CY, Sonntag K-C, Woo T-UW. Differentiation of oligodendrocyte  
984 precursors is impaired in the prefrontal cortex in schizophrenia. *Schizophr Res*. 2015 Dec;169(1–  
985 3):374–80.
- 986 78. Mistry M, Gillis J, Pavlidis P. Genome-wide expression profiling of schizophrenia using a large  
987 combined cohort. *Mol Psychiatry*. 2013 Feb;18(2):215–25.
- 988 79. Choi KH, Higgs BW, Wendland JR, Song J, McMahon FJ, Webster MJ. Gene expression and  
989 genetic variation data implicate PCLO in bipolar disorder. *Biol Psychiatry*. 2011 Feb 15;69(4):353–  
990 9.
- 991 80. Montañó CM, Irizarry RA, Kaufmann WE, Talbot K, Gur RE, Feinberg AP, et al. Measuring cell-  
992 type specific differential methylation in human brain tissue. *Genome Biol*. 2013;14(8):R94.
- 993 81. Tasic B, Menon V, Nguyen TN, Kim TK, Jarsky T, Yao Z, et al. Adult mouse cortical cell  
994 taxonomy revealed by single cell transcriptomics. *Nat Neurosci*. 2016 Feb;19(2):335–46.
- 995 82. Mancarci O, Toker L, Tripathy S, Li B, Rocco B, Sibille E, et al. NeuroExpresso: A cross-  
996 laboratory database of brain cell-type expression profiles with applications to marker gene  
997 identification and bulk brain tissue transcriptome interpretation. *bioRxiv* [Internet]. 2016 Nov 22;  
998 Available from: <http://biorxiv.org/content/biorxiv/early/2016/11/22/089219.full.pdf>
- 999 83. Bowling K, Ramaker RC, Lasseigne BN, Hagenauer M, Hardigan A, Davis N, et al. Post-mortem  
1000 molecular profiling of three psychiatric disorders reveals widespread dysregulation of cell-type  
1001 associated transcripts and refined disease-related transcription changes. *bioRxiv*. 2016 Jun  
1002 29;061416.
- 1003 84. Chase KA, Rosen C, Gin H, Bjorkquist O, Feiner B, Marvin R, et al. Metabolic and inflammatory  
1004 genes in schizophrenia. *Psychiatry Res*. 2015 Jan 30;225(1–2):208–11.

Running Head: PREDICTING CELL TYPE BALANCE

- 1005 85. Medina A, Watson SJ, Bunney W, Myers RM, Schatzberg A, Barchas J, et al. Evidence for  
1006 alterations of the glial syncytial function in major depressive disorder. *J Psychiatr Res.* 2016  
1007 Jan;72:15–21.
- 1008 86. Turner CA, Watson SJ, Akil H. The fibroblast growth factor family: neuromodulation of affective  
1009 behavior. *Neuron.* 2012 Oct 4;76(1):160–74.
- 1010  
1011
